# Supplementary material for: Dietary Macronutrient Intake and Cardiovascular Disease Risk and Mortality: A Systematic Review and Dose-Response Meta-Analysis of Prospective Cohort Studies
Source: MDPI journal article supplement (doi:10.3390/nu16010152), 2024-01-02
Supplement: s1 [file s1]

## Online Supplemental Material

Re: Yibin Ma et al. Dietary Macronutrient Intake and Cardiovascular Disease Risk and Mortality: A Systematic Review and Dose-Response Meta-analysis of Prospective Cohort Studies

### Table of Contents

|                                                                                                                                                                                   |          |
|-----------------------------------------------------------------------------------------------------------------------------------------------------------------------------------|----------|
| <b>Supplemental Tables.....</b>                                                                                                                                                   | <b>2</b> |
| Table S1: PRISMA 2020 Checklist .....                                                                                                                                             | 2        |
| Table S2: MOOSE (Meta-analyses of Observational Studies in Epidemiology) Checklist. ....                                                                                          | 5        |
| Table S3: PECOTS framework of the search strategy.....                                                                                                                            | 7        |
| Table S4: Characteristics of included studies for association between macronutrients intake and CVD events in adults aged 19 or older. ....                                       | 8        |
| Table S5: Characteristics of included studies for association between macronutrients intake and all cause mortality and cause-specific mortality in adults aged 19 or older. .... | 11       |
| Table S6: Variety of Macronutrients intake assessment and outcome methods .....                                                                                                   | 16       |
| Table S7: Confounding variables of included prospective cohort studies. ....                                                                                                      | 25       |
| Table S8: Newcastle-Ottawa Scale (NOS) scores of included prospective cohort studies.....                                                                                         | 32       |
| Table S9: gender subgroup-analysis of dietary macronutrient intake and on mortality or CVD events .....                                                                           | 40       |
| Table S10: religion subgroup-analysis of dietary macronutrient intake and on mortality or CVD events .....                                                                        | 42       |
| Table S11: Begg's test and Egger's test for publication bias among studies .....                                                                                                  | 44       |

## Supplemental Tables

**Table S1.** PRISMA or MOOSE Health Research Reporting Checklist.

| Section and Topic             | Item # | Checklist item                                                                                                                                                                                                                                                                                       | Location where item is reported |
|-------------------------------|--------|------------------------------------------------------------------------------------------------------------------------------------------------------------------------------------------------------------------------------------------------------------------------------------------------------|---------------------------------|
| <b>TITLE</b>                  |        |                                                                                                                                                                                                                                                                                                      |                                 |
| Title                         | 1      | Identify the report as a systematic review.                                                                                                                                                                                                                                                          | 1                               |
| <b>ABSTRACT</b>               |        |                                                                                                                                                                                                                                                                                                      |                                 |
| Abstract                      | 2      | See the PRISMA 2020 for Abstracts checklist.                                                                                                                                                                                                                                                         | 1                               |
| <b>INTRODUCTION</b>           |        |                                                                                                                                                                                                                                                                                                      |                                 |
| Rationale                     | 3      | Describe the rationale for the review in the context of existing knowledge.                                                                                                                                                                                                                          | 2                               |
| Objectives                    | 4      | Provide an explicit statement of the objective(s) or question(s) the review addresses.                                                                                                                                                                                                               | 2                               |
| <b>METHODS</b>                |        |                                                                                                                                                                                                                                                                                                      |                                 |
| Eligibility criteria          | 5      | Specify the inclusion and exclusion criteria for the review and how studies were grouped for the syntheses.                                                                                                                                                                                          | 3, Supplemental Table S3        |
| Information sources           | 6      | Specify all databases, registers, websites, organisations, reference lists and other sources searched or consulted to identify studies. Specify the date when each source was last searched or consulted.                                                                                            | 3                               |
| Search strategy               | 7      | Present the full search strategies for all databases, registers and websites, including any filters and limits used.                                                                                                                                                                                 |                                 |
| Selection process             | 8      | Specify the methods used to decide whether a study met the inclusion criteria of the review, including how many reviewers screened each record and each report retrieved, whether they worked independently, and if applicable, details of automation tools used in the process.                     | Figure 1                        |
| Data collection process       | 9      | Specify the methods used to collect data from reports, including how many reviewers collected data from each report, whether they worked independently, any processes for obtaining or confirming data from study investigators, and if applicable, details of automation tools used in the process. | 3                               |
| Data items                    | 10a    | List and define all outcomes for which data were sought. Specify whether all results that were compatible with each outcome domain in each study were sought (e.g. for all measures, time points, analyses), and if not, the methods used to decide which results to collect.                        | 3                               |
|                               | 10b    | List and define all other variables for which data were sought (e.g. participant and intervention characteristics, funding sources). Describe any assumptions made about any missing or unclear information.                                                                                         | 3<br>Supplemental Tables S4-S5  |
| Study risk of bias assessment | 11     | Specify the methods used to assess risk of bias in the included studies, including details of the tool(s) used, how many reviewers assessed each study and whether they worked independently, and if applicable, details of automation tools used in the process.                                    | 3                               |
| Effect measures               | 12     | Specify for each outcome the effect measure(s) (e.g. risk ratio, mean difference) used in the synthesis or presentation of results.                                                                                                                                                                  | 3                               |
| Synthesis methods             | 13a    | Describe the processes used to decide which studies were eligible for each synthesis (e.g. tabulating the study intervention characteristics and comparing against the planned groups for each synthesis (item #5)).                                                                                 | 4, Supplemental Tables S4-S5    |
|                               | 13b    | Describe any methods required to prepare the data for presentation or synthesis, such as handling of missing summary statistics, or data conversions.                                                                                                                                                | 4                               |

| Section and Topic             | Item # | Checklist item                                                                                                                                                                                                                                                                       | Location where item is reported              |
|-------------------------------|--------|--------------------------------------------------------------------------------------------------------------------------------------------------------------------------------------------------------------------------------------------------------------------------------------|----------------------------------------------|
|                               | 13c    | Describe any methods used to tabulate or visually display results of individual studies and syntheses.                                                                                                                                                                               | 3-4, Supplemental Tables S4-S5               |
|                               | 13d    | Describe any methods used to synthesize results and provide a rationale for the choice(s). If meta-analysis was performed, describe the model(s), method(s) to identify the presence and extent of statistical heterogeneity, and software package(s) used.                          | 3-4                                          |
|                               | 13e    | Describe any methods used to explore possible causes of heterogeneity among study results (e.g. subgroup analysis, meta-regression).                                                                                                                                                 | 3-4                                          |
|                               | 13f    | Describe any sensitivity analyses conducted to assess robustness of the synthesized results.                                                                                                                                                                                         | 3-4                                          |
| Reporting bias assessment     | 14     | Describe any methods used to assess risk of bias due to missing results in a synthesis (arising from reporting biases).                                                                                                                                                              | 3-4                                          |
| Certainty assessment          | 15     | Describe any methods used to assess certainty (or confidence) in the body of evidence for an outcome.                                                                                                                                                                                | 3-4                                          |
| <b>RESULTS</b>                |        |                                                                                                                                                                                                                                                                                      |                                              |
| Study selection               | 16a    | Describe the results of the search and selection process, from the number of records identified in the search to the number of studies included in the review, ideally using a flow diagram.                                                                                         | Figure 1                                     |
|                               | 16b    | Cite studies that might appear to meet the inclusion criteria, but which were excluded, and explain why they were excluded.                                                                                                                                                          | 4-5                                          |
| Study characteristics         | 17     | Cite each included study and present its characteristics.                                                                                                                                                                                                                            | Supplemental Tables S4-S5                    |
| Risk of bias in studies       | 18     | Present assessments of risk of bias for each included study.                                                                                                                                                                                                                         | Supplemental Table S8                        |
| Results of individual studies | 19     | For all outcomes, present, for each study: (a) summary statistics for each group (where appropriate) and (b) an effect estimate and its precision (e.g. confidence/credible interval), ideally using structured tables or plots.                                                     | Figures 2-7, Supplemental Figures 1-38       |
| Results of syntheses          | 20a    | For each synthesis, briefly summarise the characteristics and risk of bias among contributing studies.                                                                                                                                                                               | 12-13                                        |
|                               | 20b    | Present results of all statistical syntheses conducted. If meta-analysis was done, present for each the summary estimate and its precision (e.g. confidence/credible interval) and measures of statistical heterogeneity. If comparing groups, describe the direction of the effect. | 7-13, Figures 2-7, Supplemental Figures 1-38 |
|                               | 20c    | Present results of all investigations of possible causes of heterogeneity among study results.                                                                                                                                                                                       | 15-16, Supplemental Table S11                |
|                               | 20d    | Present results of all sensitivity analyses conducted to assess the robustness of the synthesized results.                                                                                                                                                                           | 15-16, Supplemental Table S11                |
| Reporting biases              | 21     | Present assessments of risk of bias due to missing results (arising from reporting biases) for each synthesis assessed.                                                                                                                                                              | 15-16, Supplemental Table S11                |
| Certainty of evidence         | 22     | Present assessments of certainty (or confidence) in the body of evidence for each outcome assessed.                                                                                                                                                                                  | 15-16                                        |
| <b>DISCUSSION</b>             |        |                                                                                                                                                                                                                                                                                      |                                              |

| Section and Topic                              | Item # | Checklist item                                                                                                                                                                                                                             | Location where item is reported |
|------------------------------------------------|--------|--------------------------------------------------------------------------------------------------------------------------------------------------------------------------------------------------------------------------------------------|---------------------------------|
| Discussion                                     | 23a    | Provide a general interpretation of the results in the context of other evidence.                                                                                                                                                          | 16-17                           |
|                                                | 23b    | Discuss any limitations of the evidence included in the review.                                                                                                                                                                            | 20-21                           |
|                                                | 23c    | Discuss any limitations of the review processes used.                                                                                                                                                                                      | 20-21                           |
|                                                | 23d    | Discuss implications of the results for practice, policy, and future research.                                                                                                                                                             | 21                              |
| <b>OTHER INFORMATION</b>                       |        |                                                                                                                                                                                                                                            |                                 |
| Registration and protocol                      | 24a    | Provide registration information for the review, including register name and registration number, or state that the review was not registered.                                                                                             | Abstract, 1                     |
|                                                | 24b    | Indicate where the review protocol can be accessed, or state that a protocol was not prepared.                                                                                                                                             | Abstract, 6                     |
|                                                | 24c    | Describe and explain any amendments to information provided at registration or in the protocol.                                                                                                                                            | NA                              |
| Support                                        | 25     | Describe sources of financial or non-financial support for the review, and the role of the funders or sponsors in the review.                                                                                                              | 21                              |
| Competing interests                            | 26     | Declare any competing interests of review authors.                                                                                                                                                                                         | 21                              |
| Availability of data, code and other materials | 27     | Report which of the following are publicly available and where they can be found: template data collection forms; data extracted from included studies; data used for all analyses; analytic code; any other materials used in the review. | 21-22                           |

From: Page MJ, McKenzie JE, Bossuyt PM, Boutron I, Hoffmann TC, Mulrow CD, et al. The PRISMA 2020 statement: an updated guideline for reporting systematic reviews. BMJ 2021;372:n71. doi: 10.1136/bmj.n71 .

**Table S2.** MOOSE (Meta-analyses of Observational Studies in Epidemiology) Checklist<sup>a</sup>.

| Reporting Criteria                                                                                                                         | Reported (Yes/No) | Reported on Page No.                 |
|--------------------------------------------------------------------------------------------------------------------------------------------|-------------------|--------------------------------------|
| <b>Reporting of Background</b>                                                                                                             |                   |                                      |
| Problem definition                                                                                                                         | Yes               | 1-2                                  |
| Description of Study Outcome(s)                                                                                                            | Yes               | 1-2                                  |
| Type of exposure or intervention used                                                                                                      | Yes               | 1-3                                  |
| Study population                                                                                                                           | Yes               | 1-3                                  |
| <b>Reporting of Search Strategy</b>                                                                                                        |                   |                                      |
| Qualifications of searchers (eg, librarians and investigators)                                                                             | Yes               | 1                                    |
| Search strategy, including time period included in the synthesis and keywords                                                              | Yes               | 2-3, Supplemental Table S3           |
| Effort to include all available studies, including contact with authors                                                                    | Yes               | 3                                    |
| Databases and registries searched                                                                                                          | Yes               | 3                                    |
| Search software used, name and version, including special features used (eg, explosion)                                                    | Yes               | 4                                    |
| Use of hand searching (eg, reference lists of obtained articles)                                                                           | Yes               | 3-4, Figure 1, Supplemental Table S3 |
| List of citations located and those excluded, including justification                                                                      | Yes               | Figure 1                             |
| Method for addressing articles published in languages other than English                                                                   | Yes               | 3                                    |
| Method of handling abstracts and unpublished studies                                                                                       | Yes               | 3, Supplemental Table S3             |
| Description of any contact with authors                                                                                                    | Yes               | 3, 4                                 |
| <b>Reporting of Methods</b>                                                                                                                |                   |                                      |
| Description of relevance or appropriateness of studies assembled for assessing the hypothesis to be tested                                 | Yes               | 3                                    |
| Rationale for the selection and coding of data (eg., sound clinical principles or convenience)                                             | Yes               | 3                                    |
| Documentation of how data were classified and coded (eg., multiple raters, blinding, and interrater reliability)                           | Yes               | 3                                    |
| Assessment of confounding (eg., comparability of cases and controls in studies were appropriate)                                           | Yes               | 3                                    |
| <b>Reporting Criteria</b>                                                                                                                  |                   |                                      |
| Assessment of study quality, including blinding of quality assessors; stratification or regression on possible predictors of study results | Yes               | 3                                    |

|                                                                                                                                                                                                                                                                               |     |                                             |
|-------------------------------------------------------------------------------------------------------------------------------------------------------------------------------------------------------------------------------------------------------------------------------|-----|---------------------------------------------|
| Assessment of heterogeneity                                                                                                                                                                                                                                                   | Yes | 3                                           |
| Description of statistical methods (eg., complete description of fixed or random effects models, justification of whether the chosen models account for predictors of study results, dose-response models, or cumulative meta-analysis) in sufficient detail to be replicated | Yes | 3,4                                         |
| Provision of appropriate tables and graphics                                                                                                                                                                                                                                  | Yes | Table 1, Figures 1-7, Supplemental Material |
| <b>Reporting of Results</b>                                                                                                                                                                                                                                                   |     |                                             |
| Table giving descriptive information for each study included                                                                                                                                                                                                                  | Yes | Table 1, Supplemental Tables S3-S4          |
| Results of sensitivity testing (eg., subgroup analysis)                                                                                                                                                                                                                       | Yes | 15, 16 Supplemental Tables S9-S10           |
| Indication of statistical uncertainty of findings                                                                                                                                                                                                                             | Yes | 15,16 Supplemental Table S11                |
| <b>Reporting of Discussion</b>                                                                                                                                                                                                                                                |     |                                             |
| Quantitative assessment of bias (eg., publication bias)                                                                                                                                                                                                                       | Yes | 21                                          |
| Justification for exclusion (eg., exclusion of non-English-language citations)                                                                                                                                                                                                | Yes | NA                                          |
| Assessment of quality of included studies                                                                                                                                                                                                                                     | Yes | 7, Supplemental Table S 8                   |
| <b>Reporting of Conclusions</b>                                                                                                                                                                                                                                               |     |                                             |
| Consideration of alternative explanations for observed results                                                                                                                                                                                                                | Yes | 16-21                                       |
| Generalization of the conclusions (ie, appropriate for the data presented and within the domain of the literature review)                                                                                                                                                     | Yes | 16-21                                       |
| Guidelines for future research                                                                                                                                                                                                                                                | Yes | 21                                          |
| Disclosure of funding source                                                                                                                                                                                                                                                  | Yes | 21                                          |

NA = Not applicable. <sup>a</sup>Stroup DF, Berlin JA, Morton SC, Olkin I, Williamson GD, Rennie D, Moher D, Becker BJ, Sipe TA, Thacker SB. Meta-analysis of observational studies in epidemiology: a proposal for reporting. Meta-analysis Of Observational Studies in Epidemiology (MOOSE) group. JAMA. 2000 Apr 19;283(15):2008-12. doi: 10.1001/jama.283.15.2008. PMID: 10789670.

**Table S3.** PECOTS framework of the search strategy.

| PECOTS framework <sup>a</sup> defined in the present systematic review and meta-analysis                                                                   |                                                                                   |                                                                                  |                                                                                                                              |                                                      |                          |
|------------------------------------------------------------------------------------------------------------------------------------------------------------|-----------------------------------------------------------------------------------|----------------------------------------------------------------------------------|------------------------------------------------------------------------------------------------------------------------------|------------------------------------------------------|--------------------------|
| Participants                                                                                                                                               | Exposure                                                                          | Comparators                                                                      | Outcomes                                                                                                                     | Time/<br>Duration                                    | Setting/<br>Study Design |
| Adults (≥ 18 years) of any sex, gender, and ethnicity, and free of CVD at baseline (for analysis of CVD-related incidence) otherwise of any health status. | Higher variety of protein and/or fat and/or carbohydrate consumption in the diet. | Lower variety of protein and/or fat and/or carbohydrate consumption in the diet. | <i>Mortality:</i><br>All-cause<br>CVD-related<br>cancer-related<br><br><i>CVD incidence:</i><br>Overall CVD<br>CHD<br>Stroke | prospective cohort<br>(at least 1 year in duration). |                          |

Abbreviations: CHD, coronary heart disease; CVD, cardiovascular disease; <sup>a</sup>MoherD, ShamseerL, Clarke M, GheraD, LiberatiA, Petticrew M, Shekelle P, Stewart LA and PRISMA-P Group. Preferred reporting items for systematic review and meta-analysis protocols (PRISMA-P) 2015 statement. Systematic Reviews 2015; 4:1. <https://doi.org/10.1186/2046-4053-4-1>.

**Table S4.** Characteristics of included studies for association between macronutrients intake and CVD events in adults aged 19 or older.

| Author,<br>publication year                | Study cohort/<br>populations                                      | Country | baseline age<br>(years, mean or<br>range) | female<br>(%) | Follow-up<br>(years) | number of<br>participants | Exposure                                                        | Quantity<br>(Highest vs<br>Lowest Intake)                     | Number of CVD events |      |        | NOS<br>score |
|--------------------------------------------|-------------------------------------------------------------------|---------|-------------------------------------------|---------------|----------------------|---------------------------|-----------------------------------------------------------------|---------------------------------------------------------------|----------------------|------|--------|--------------|
|                                            |                                                                   |         |                                           |               |                      |                           |                                                                 |                                                               | CVD                  | CHD  | stroke |              |
| McGee et al.,<br>1984 <sup>91</sup>        | The Honolulu Heart<br>Program                                     | Japan   | ≥45                                       | 0             | 10                   | 7544                      | SFA                                                             | Q5 vs Q1                                                      | NA                   | 1177 | 492    | 8            |
| Fehily et al.,<br>1993 <sup>93</sup>       | the Caerphilly Study                                              | UK      | 45-95                                     | 0             | 5                    | 2432                      | SFA                                                             | Q3 vs Q1                                                      | NA                   | 21   | NA     | 7            |
| Goldbourt et al.,<br>1993 <sup>34</sup>    | NA                                                                | Israel  | ≥40                                       | 0             | 23                   | 10059                     | SFA                                                             | Q4 vs Q1                                                      | NA                   | 1070 | 362    | 6            |
| Ascherio et al.,<br>1995 <sup>96</sup>     | HPFS                                                              | US      | 40-75                                     | 0             | 6                    | 44895                     | n-3 fatty acids                                                 | Q5 vs Q1                                                      | NA                   | 1543 | NA     | 8            |
| Ascherio et al.,<br>1996 <sup>35</sup>     | HPFS                                                              | US      | 40-75                                     | 0             | 6                    | 43757                     | total fat, SFA                                                  | Q5 vs Q1                                                      | NA                   | 737  | NA     | 8            |
| Gillman et al.,<br>1997 <sup>97</sup>      | The Framingham Heart<br>Study                                     | US      | 40-65                                     | 0             | 20                   | 832                       | total fat, SFA, MUFA,<br>PUFA                                   | 15% energy                                                    | NA                   | NA   | 61     | 8            |
| Hu et al.,1997 <sup>98</sup>               | NHS                                                               | US      | 34-59                                     | 100           | 15                   | 80082                     | total fat, SFA, MUFA,<br>PUFA, animal fat, plant fat            | Q5 vs Q1                                                      | NA                   | 658  | NA     | 8            |
| Pietinen et al.,<br>1997 <sup>38</sup>     | The Alpha Tocopherol,<br>Beta Carotene Cancer<br>Prevention Study | Finland | 50-69                                     | 0             | 6.1                  | 21930                     | SFA, MUFA ,PUFA                                                 | Q5 vs Q1                                                      | NA                   | 1399 | NA     | 7            |
| Seino et al., 1997 <sup>99</sup>           | The Shibata Study                                                 | Japan   | ≥40                                       | 58.2          | 15.5                 | 2283                      | total fat,SFA,MUFA,PUFA                                         | Q4 vs Q1                                                      | NA                   | NA   | 75     | 7            |
| Hu et al.,1999 <sup>101</sup>              | NHS                                                               | US      | 34-59                                     | 100           | 15                   | 80082                     | SFA subgroup                                                    | Q5 vs Q1                                                      | NA                   | 939  | NA     | 8            |
| Hu et al.,1999 <sup>102</sup>              | NHS                                                               | US      | NA                                        | 100           | 15                   | 80082                     | total protein, animal<br>protein, plant protein                 | Q5 vs Q1                                                      | NA                   | 658  | NA     | 8            |
| Liu et al.,2000 <sup>104</sup>             | NHS                                                               | US      | 38-63                                     | 100           | 10                   | 75521                     | carbohydrate                                                    | Q5 vs Q1                                                      | 761                  | NA   | NA     | 8            |
| Iso et al.,2001 <sup>106</sup>             | NHS                                                               | US      | NA                                        | 100           | 14                   | 85764                     | animal protein, plant<br>protein, total fat, SFA,<br>MUFA, PUFA | Q5 vs Q1                                                      | NA                   | NA   | 690    | 8            |
| He et al.,2003 <sup>107</sup>              | HPFS                                                              | US      | 40-75                                     | 0             | 14                   | 43743                     | total fat, SFA, MUFA,<br>PUFA, animal fat, plant fat            | Q5 vs Q1                                                      | NA                   | NA   | 725    | 8            |
| Hu et al.,2003 <sup>108</sup>              | NHS                                                               | US      | 30-55                                     | 100           | 16                   | 5130                      | ω-3 Fatty Acids                                                 | Q5 vs Q1                                                      | NA                   | 362  | NA     | 8            |
| Iso et al.,2003 <sup>109</sup>             | NA                                                                | Japan   | 40-69                                     | 52.5          | 14.3                 | 4775                      | total fat, SFA, MUFA,<br>PUFA                                   | Q4 vs Q1                                                      | NA                   | NA   | 186    | 8            |
| Zhang et al.,<br>2003 <sup>110</sup>       | SWHS                                                              | China   | 40-70                                     | 100           | 2.5                  | 64915                     | total soy protein                                               | Q4 vs Q1                                                      | NA                   | 62   | NA     | 7            |
| Jakobsen et<br>al.,2004 <sup>112</sup>     | the Research Centre<br>for Prevention and<br>Health               | Denmark | 30-71                                     | 50.2          | 16                   | 3686                      | total fat, SFA, MUFA,<br>PUFA                                   | intake of 5%<br>higher level of<br>energy from<br>dietary fat | NA                   | 326  | NA     | 8            |
| Tanasescu et<br>al.,2004 <sup>113</sup>    | NHS                                                               | US      | 40-55                                     | 100           | 19                   | 5672                      | total fat, SFA, MUFA,<br>PUFA, animal fat, plant fat            | Q5 vs Q1                                                      | 619                  | 451  | 168    | 8            |
| Oh et al.,2005 <sup>115</sup>              | NHS                                                               | US      | 30-55                                     | 100           | 18                   | 78779                     | carbohydrate                                                    | Q5 vs Q1                                                      | NA                   | NA   | 1020   | 8            |
| Oh et al.,2005 <sup>116</sup>              | NHS                                                               | US      | 30-55                                     | 100           | 18                   | 78779                     | total fat, SFA, MUFA,<br>PUFA                                   | Q5 vs Q1                                                      | NA                   | NA   | 1020   | 8            |
| Trichopoulou et<br>al. 2006 <sup>117</sup> | Greek-EPIC Cohort                                                 | Greece  | NA                                        | 48            | 4.5                  | 1013                      | SFA, MUFA, PUFA                                                 |                                                               | 80                   | 46   | 19     | 9            |



Supplemental Table S4 | Continued

| author,<br>publication year                | Study cohort/<br>populations                                                             | Country | baseline age<br>(years, mean or<br>range) | female<br>(%) | Follow-up<br>(years) | number of<br>participants | Exposure                                                   | Quantity<br>(Highest vs<br>Lowest Intake) | Number of CVD events |      |        | NOS<br>score |
|--------------------------------------------|------------------------------------------------------------------------------------------|---------|-------------------------------------------|---------------|----------------------|---------------------------|------------------------------------------------------------|-------------------------------------------|----------------------|------|--------|--------------|
|                                            |                                                                                          |         |                                           |               |                      |                           |                                                            |                                           | CVD                  | CHD  | stroke |              |
| Xu et al.,2006 <sup>46</sup>               | the Strong Heart Study                                                                   | US      | 47–59                                     | 61.1          | 7.2±2.3              | 1659                      | total fat, SFA, MUFA,<br>PUFA                              | Q4 vs Q1                                  | NA                   | 185  | NA     | 8            |
| Leosdottir et al.,<br>2007 <sup>118</sup>  | The Malmö Diet and<br>Cancer Study                                                       | Sweden  | 60–79                                     | 68.3          | 7.2±2.3              | 1279                      | total fat, SFA, MUFA,<br>PUFA                              | Q4 vs Q1                                  | NA                   | 218  | NA     | 6            |
| Boden-Albala et<br>al.,2009 <sup>120</sup> | the Northern Manhattan<br>Study                                                          | US      | 57                                        | 69.0          | 8.4                  | 28098                     | total fat                                                  | Q5 vs Q1                                  | 1556                 | 908  | 648    | 7            |
| Preis et al., 2010 <sup>123</sup>          | HPFS                                                                                     | US      | 69                                        | 63            | 5.5                  | 3183                      | total protein                                              | Q5 vs Q1                                  | NA                   | NA   | 142    | 8            |
| Yamagishi et<br>al.,2010 <sup>124</sup>    | JACC                                                                                     | Japan   | 40-75                                     | 0             | 18                   | 51529                     | SFA                                                        | Q5 vs Q1                                  | NA                   | 2959 | NA     | 9            |
| Atkinson et<br>al.,2011 <sup>125</sup>     | the Caerphilly cohort                                                                    | US      | 40-79                                     | 60.6          | 14.1                 | 58453                     | total fat, SFA                                             | Q5 vs Q1                                  | NA                   | 420  | 321    | 7            |
| Houston et<br>al.,2011 <sup>126</sup>      | the Health ABC Study                                                                     | US      | 45-59                                     | 0             | 18                   | 2710                      | total fat, SFA, MUFA,<br>PUFA                              | Q5 vs Q1                                  | NA                   | NA   | 225    | 8            |
| de Oliveira et<br>al.,2012 <sup>128</sup>  | United States MESA<br>Cohort                                                             | US      | 66,48-79                                  | 44.4          | 9                    | 1941                      | SFA                                                        | For each 5% of<br>energy                  | 203                  | NA   | NA     | 8            |
| Dilis et al.,2012 <sup>47</sup>            | The EPIC cohort                                                                          | Greek   | 45-84                                     | 50            | 10                   | 5209                      | total fat, SFA, MUFA,<br>PUFA                              | T3 vs T1                                  | 316                  | 231  | NA     | 8            |
| Larsson et<br>al.,2012 <sup>129</sup>      | the Swedish<br>Mammography Cohort                                                        | Sweden  | 20-86                                     | 59.3          | 10                   | 23929                     | total protein, animal<br>protein, plant protein            | Q5 vs Q1                                  | NA                   | 426  | NA     | 8            |
| Larsson et<br>al.,2012 <sup>61</sup>       | the Swedish<br>Mammography Cohort                                                        | Sweden  | 49-83                                     | 100           | 10.4                 | 34670                     | total fat, SFA, MUFA,<br>PUFA                              | Q5 vs Q1                                  | NA                   | NA   | 1680   | 8            |
| Wallstrom et<br>al.,2012 <sup>131</sup>    | Swedish population-<br>based Malmö Diet and<br>Cancer cohort                             | Sweden  | 49-83                                     | 100           | 10.4                 | 34670                     | total protein, total fat, SFA,<br>MUFA, PUFA, carbohydrate | Q5 vs Q1                                  | 1089                 | 688  | 401    | 8            |
| Yaemsiri et<br>al.,2012 <sup>132</sup>     | the WHI-OS                                                                               | US      | 44-73                                     | 100           | 13.5                 | 8139                      | total fat, SFA, MUFA,<br>PUFA                              | Q5 vs Q1                                  | NA                   | 333  | 354    | 7            |
| Simila et<br>al.,2013 <sup>134</sup>       | ATBC                                                                                     | Finland | 63.5±7.3, 50-79                           | 100           | 7.6                  | 87025                     | Carbohydrate                                               | Q5 vs Q1                                  | NA                   | NA   | 1049   | 7            |
| Yamagishi et<br>al.,2013 <sup>135</sup>    | JPHC                                                                                     | Japan   | 50-69                                     | 0             | 19                   | 21955                     | SFA                                                        | Q5 vs Q1                                  | NA                   | 4379 | NA     | 8            |
| Yu et al.,2013 <sup>136</sup>              | China Shanghai study                                                                     | China   | 45-64,45-74                               | 53.5          | 11.1                 | 81931                     | Carbohydrate                                               | Q4 vs Q1                                  | NA                   | NA   | 3192   | 8            |
| Haring et<br>al.,2014 <sup>138</sup>       | ARIC                                                                                     | US      | 40-74                                     | 55.3          | F:9.8, M:5.4         | 117366                    | total protein, animal<br>protein, plant protein            | Q5 vs Q1                                  | NA                   | 309  | NA     | 7            |
| dos Santos et<br>al.,2014 <sup>137</sup>   | the Diabetes research<br>outpatient clinic at<br>Hospital de Clínicas de<br>Porto Alegre | Brazil  | 45-64                                     | 55.8          | 22                   | 12066                     | PUFA                                                       | Q4 vs Q1                                  | 1147                 | NA   | NA     | 6            |
| Virtanen et<br>al.,2014 <sup>142</sup>     | KIHD                                                                                     | Finland | 59±10                                     | 54.2          | 4.6                  | 227                       | total fat, SFA, MUFA,<br>PUFA                              | Q4 vs Q1                                  | 36                   | NA   | NA     | 7            |
| Chiuve et<br>al.,2015 <sup>144</sup>       | WHS                                                                                      | US      | 42-60                                     | 0             | 21.4                 | 1981                      | total fat, SFA, MUFA,<br>PUFA                              | Q5 vs Q1                                  | NA                   | 565  | NA     | 8            |
| Guasch-Ferré et<br>al.,2015 <sup>62</sup>  | the PREDIMED study                                                                       | Spain   | ≥45                                       | 100           | 20                   | 33665                     | total fat, SFA, MUFA,<br>PUFA                              | Q5 vs Q1                                  | NA                   | 1441 | NA     | 9            |
| Li et al.,2015 <sup>145</sup>              | NHS                                                                                      | US      | 67±6                                      | 57.5          | 6                    | 7038                      | total fat, SFA, MUFA,<br>PUFA, carbohydrate                | Q5 vs Q1                                  | 336                  | NA   | NA     | 8            |
| Puaschitz et<br>al.,2015 <sup>147</sup>    | HPFS                                                                                     | US      | 30-55                                     | 100           | 30                   | 84628                     | SFA                                                        | Q4 vs Q1                                  | NA                   | 7667 | NA     | 7            |
|                                            | WENBIT                                                                                   | Norway  | 40-75                                     | 0             | 24                   | 42908                     |                                                            |                                           | NA                   | 292  | NA     |              |
|                                            |                                                                                          |         | 61.7                                      | 19            | 4.8                  | 2412                      |                                                            |                                           |                      |      |        |              |

Supplemental Table S4 | Continued

| author,<br>publication year          | Study cohort/<br>populations | Country       | baseline age<br>(years, mean or<br>range) | female<br>(%) | Follow-up<br>(years) | number of<br>participants | Exposure                                                | Quantity<br>(Highest vs<br>Lowest Intake) | Number of CVD events |      |        | NOS<br>score |
|--------------------------------------|------------------------------|---------------|-------------------------------------------|---------------|----------------------|---------------------------|---------------------------------------------------------|-------------------------------------------|----------------------|------|--------|--------------|
|                                      |                              |               |                                           |               |                      |                           |                                                         |                                           | CVD                  | CHD  | stroke |              |
| Chen et al., 2016 <sup>148</sup>     | HPFS                         | US            | 40-75                                     | 0             |                      | 51529                     | total fat                                               | Q5 vs Q1                                  | 5825                 | 4422 | 1403   |              |
|                                      | NHS                          | US            | 30-55                                     | 100           |                      | 92468                     | total fat                                               | Q5 vs Q1                                  | 8018                 | 4055 | 3963   | 8            |
|                                      | NHS II                       | US            | 25-42                                     | 100           |                      | 97604                     | total fat                                               | Q5 vs Q1                                  | 972                  | 497  | 475    |              |
| Praagman et al., 2016 <sup>152</sup> | The EPIC-NL cohort           | Holland       | 49.3                                      | 75            | 12.2                 | 35597                     | SFA                                                     | Q5 vs Q1                                  | NA                   | 1807 | NA     | 7            |
| Xu et al., 2016 <sup>154</sup>       | ULSAM                        | Sweden        | 71.0 ± 0.6                                | 0             | 9.1                  | 390                       | total protein                                           | per SD 8.37<br>g/day higher               | 164                  | NA   | NA     | 7            |
| Zong et al., 2016 <sup>155</sup>     | NHS                          | US            | 50.2                                      | 63.2          | 25.8                 | 115782                    | SFA subgroup                                            | Q5 vs Q1                                  | NA                   | 7035 | NA     | 8            |
|                                      | HPFS                         |               | 53.1                                      |               | 21.2                 |                           |                                                         |                                           |                      |      |        |              |
| Dehghan et al., 2017 <sup>13</sup>   | PURE                         | 18 countries* | 50.29 ± 9.92, 35-70                       | 58.7          | 7.4                  | 135335                    | total protein, total fat, SFA, MUFA, PUFA, carbohydrate | Q5 vs Q1                                  | 4787                 | 2143 | 2234   | 8            |
| AlEsa et al., 2018 <sup>159</sup>    | NHS                          | US            | 30-55                                     | 100           | 28                   | 75,020                    | Carbohydrate                                            | Q5 vs Q1                                  | NA                   | 3267 | NA     | 8            |
|                                      | HPFS                         | US            | 40-75                                     | 0             | 26                   | 42,865                    | Carbohydrate                                            | Q5 vs Q1                                  | NA                   | 4053 | NA     |              |
| Okada et al., 2019 <sup>168</sup>    | CIRCS                        | Japan         | 40-59                                     | 48.8          | 24.6                 | 3248                      | total protein, SFA, MUFA, PUFA, carbohydrate            | Q4 vs Q1                                  | NA                   | NA   | 230    | 7            |
| Rhee et al., 2017 <sup>157</sup>     | WHS                          | US            | 45+                                       | 100           | 21                   | 38392                     | Marine omega-3 fatty acids                              | Q5 vs Q1                                  | 1941                 | NA   | 987    | 7            |
| Mirmiran et al., 2020 <sup>176</sup> | TLGS                         | Iran          | 38.5 ± 13.3 (19-70)                       | 56.5          | 6.7                  | 2369                      | total fat                                               | T3 vs T1                                  | 79                   | NA   | NA     | 8            |
| Sadeghi et al., 2021 <sup>182</sup>  | ICS                          | Iran          | ≥35                                       | 51.3          | 11.5                 | 5432                      | animal fat                                              | Q4 vs Q1                                  | 751                  | 401  | 157    | 8            |

HPFS: The Health Professionals Follow-up Study; NHS: The Nurses' Health Study cohort; SWHS: The Shanghai Women's Health Study; EPIC: European Prospective Investigation into Cancer and Nutrition Study; ATBC: The Alpha-Tocopherol, Beta-Carotene Cancer Prevention Study; ARIC: The Atherosclerosis Risk in Communities Study; KIID: the population-based Kuopio Ischemic Heart Disease Risk Factor Study; WHS: the Women's Health Study; WENBIT: the Western Norway B-Vitamin Intervention Trial; ULSAM: the Uppsala Longitudinal Study of Adult Men; PURE: The Prospective Urban Rural Epidemiology study; CIRCS: The Circulatory Risk in Communities Study; ICS: Isfahan Cohort Study; Health ABC: the Health, Aging and Body Composition Health ABC study; JACC: the Japan Collaborative Cohort Study; JPHC: Japan Public Health Center-based Prospective Cohort Study; PREDIMED: PREvención con DIeta MEDiterránea cohort; The EPIC-NL cohort: the European Prospective Investigation into Cancer and Nutrition-Netherlands cohort. TLGS: the Tehran Lipid and Glucose Prospective Study. \*from 18 countries, three high-income (Canada, Sweden, and United Arab Emirates), 11 middle-income (Argentina, Brazil, Chile, China, Colombia, Iran, Malaysia, occupied Palestinian territory, Poland, South Africa, and Turkey) and four low-income countries (Bangladesh, India, Pakistan, and Zimbabwe).

**Table S5.** Characteristics of included studies for association between macronutrients intake and all cause mortality and cause-specific mortality in adults aged 19 or older.

| author,<br>publication year               | Study cohort/<br>populations                                      | Country   | baseline age<br>(years, mean or<br>range) | female<br>(%) | Follow-up<br>(years) | number of<br>participants | Exposure                                                                                                                | Quantity (Highest<br>vs Lowest Intake)        | Number of death |               |                  | NOS<br>score |
|-------------------------------------------|-------------------------------------------------------------------|-----------|-------------------------------------------|---------------|----------------------|---------------------------|-------------------------------------------------------------------------------------------------------------------------|-----------------------------------------------|-----------------|---------------|------------------|--------------|
|                                           |                                                                   |           |                                           |               |                      |                           |                                                                                                                         |                                               | All deaths      | CVD<br>deaths | Cancer<br>deaths |              |
| Posner et al.,<br>1991 <sup>92</sup>      | The Framingham<br>Study                                           | US        | 45-55,56-65                               | 0             | 16                   | 813                       | total fat, SFA, MUFA, PUFA                                                                                              | NA                                            | NA              | NA            | NA               | 8            |
| Rohan et al.,<br>1993 <sup>94</sup>       | SACCR                                                             | Australia | 20-74                                     | 100           | 5.5                  | 412                       | total protein, total fat, SFA,<br>MUFA, PUFA,<br>carbohydrates                                                          | Q5 vs Q1                                      | NA              | NA            | 112              | 8            |
| Dwyer et al.,<br>1994 <sup>95</sup>       | NHANES I                                                          | US        | 65-74                                     | 47.9          | 14.5                 | 2572                      | total protein                                                                                                           | additional 15 g of<br>protein per day         | 119             | NA            | NA               | 9            |
| Esrey et al.,<br>1996 <sup>36</sup>       | NA                                                                | US        | 30-59,60-79                               | 48.2          | 12.4                 | 4546                      | total protein, total fat, SFA,<br>MUFA, PUFA,<br>carbohydrates                                                          | per 1% increase                               | NA              | 92            | NA               | 7            |
| Mann et al.,<br>1997 <sup>37</sup>        | vegetarians, meat<br>eaters                                       | UK        | 33,16-79                                  | 62            | 13.3                 | 10802                     | total animal fat, saturated<br>animal fat                                                                               | Q3 vs Q1                                      | 392             | 64            | NA               | 8            |
| Pietinen et<br>al.,1997 <sup>38</sup>     | The Alpha Tocopherol,<br>Beta Carotene Cancer<br>Prevention Study | Finland   | 50-69                                     | 0             | 6.1                  | 21930                     | SFA, MUFA, PUFA                                                                                                         | Q5 vs Q1                                      | NA              | 635           | NA               | 7            |
| Holmes et al.,<br>1999 <sup>100</sup>     | Female registered<br>nurses                                       | US        | 54                                        | 100           | 13                   | 1982                      | total protein                                                                                                           | Q5 vs Q1                                      | 378             | NA            | NA               | 8            |
| Payette et al.,<br>1999 <sup>103</sup>    | NA                                                                | Canada    | 60-94                                     | 71.9          | 3.5                  | 288                       | total protein                                                                                                           | NA                                            | 102             | NA            | NA               | 6            |
| Palli et al.,<br>2000 <sup>105</sup>      | GC patients                                                       | Italy     | NA                                        | 37.4          | 11                   | 382                       | total protein, animal protein,<br>plant protein, total fat, SFA,<br>MUFA, PUFA, animal fat,<br>plant fat, carbohydrates | Q3 vs Q1                                      | NA              | NA            | 317              | 7            |
| Boniface et al.,<br>2002 <sup>39</sup>    | The Health and<br>Lifestyle Survey                                | UK        | 40-75                                     | 54            | 16                   | 2676                      | total fat, SFA, PUFA                                                                                                    | Q5 vs Q1                                      | NA              | 155           | NA               | 6            |
| Hu et al.,<br>2003 <sup>108</sup>         | NHS                                                               | US        | 30-55                                     | 100           | 16                   | 5130                      | $\omega$ -3 Fatty Acids                                                                                                 | Q5 vs Q1                                      | 468             | 141           | NA               | 8            |
| Sauvaget et al.,<br>2004 <sup>41</sup>    | AHS                                                               | Japan     | 57                                        | 100           | 14                   | 382                       | animal protein, plant protein,<br>total fat, SFA, MUFA, PUFA,<br>animal fat, plant fat                                  | Q3 vs Q1                                      | NA              | 60            | NA               | 7            |
| Borugian et al.,<br>2004 <sup>111</sup>   | breast cancer patients                                            | Canada    | 19-25                                     | 100           | 10                   | 603                       | total protein ,total fat                                                                                                | Q4 vs Q1                                      | NA              | NA            | 112              | 6            |
| Kelemen et al.,<br>2005 <sup>114</sup>    | The Iowa WHS                                                      | US        | 55–69                                     | 100           | 16.4                 | 278                       | total protein, animal<br>protein, plant protein                                                                         | Q5 vs Q1                                      | 3978            | 739           | 1676             | 7            |
| Leosdottir et<br>al.,2005 <sup>42</sup>   | The Malmö Diet and<br>Cancer Study                                | Sweden    | 58.3                                      | 60.6          | 6.6                  | 28098                     | total fat, SFA, MUFA, PUFA                                                                                              | Q4 vs Q1                                      | 1250            | 339           | 623              | 9            |
| Solfrizzi et<br>al.,2005 <sup>43</sup>    | ILSA                                                              | Italy     | 73.0±5.5                                  | 44.6          | 8.5                  | 278                       | total protein, total fat, SFA,<br>MUFA, PUFA,<br>carbohydrates                                                          | Q4 vs Q1                                      | 91              | NA            | NA               | 9            |
| Tucker et al.,<br>2005 <sup>45</sup>      | BLSA                                                              | US        | 62.3,34-80                                | 0             | 18                   | 501                       | SFA                                                                                                                     | NA                                            | 306             | 71            | NA               | 8            |
| Trichopoulou et<br>al,2006 <sup>117</sup> | Greek-EPIC Cohort                                                 | Greece    | NA                                        | 48            | 4.5                  | 1013                      | SFA,MUFA,PUFA                                                                                                           | NA                                            | 80              | 46            | 19               | 10           |
| Lagiou et al.,<br>2007 <sup>10</sup>      | Scandinavian<br>Women's Lifestyle and<br>Health Cohort            | Sweden    | 30–49                                     | 100           | 12                   | 42237                     | total protein, carbohydrates                                                                                            | per increasing<br>decile of protein<br>intake | 588             | 75            | 284              | 8            |

Supplemental Table S5 | Continued

| author,<br>publication year                         | Study cohort/<br>populations                                                        | Country               | baseline age<br>(years, mean or<br>range) | female<br>(%) | Follow-up<br>(years) | number of<br>participants | Exposure                                                                       | Quantity (Highest<br>vs Lowest Intake)          | Number of death |               |                  | NOS<br>score |
|-----------------------------------------------------|-------------------------------------------------------------------------------------|-----------------------|-------------------------------------------|---------------|----------------------|---------------------------|--------------------------------------------------------------------------------|-------------------------------------------------|-----------------|---------------|------------------|--------------|
|                                                     |                                                                                     |                       |                                           |               |                      |                           |                                                                                |                                                 | All deaths      | CVD<br>deaths | Cancer<br>deaths |              |
| Lagiou et al.,<br>2007 <sup>10</sup>                | Scandinavian<br>Women's Lifestyle and<br>Health Cohort<br>the Strong Heart<br>Study | Sweden                | 30–49                                     | 100           | 12                   | 42237                     | total protein, carbohydrates                                                   | per increasing<br>decile of protein<br>intake   | 588             | 75            | 284              | 8            |
| Xu et al., 2006 <sup>46</sup>                       |                                                                                     | US                    | 47–59                                     | 61.1          | 7.2±2.3              | 1659                      | total fat, SFA, MUFA, PUFA                                                     | Q4 vs Q1                                        | NA              | 46            | NA               | 8            |
|                                                     |                                                                                     |                       | 60–79                                     | 68.3          |                      | 1279                      |                                                                                | NA                                              | 92              | NA            |                  |              |
| Smit et al.,<br>2007 <sup>119</sup>                 | PRHHP                                                                               | US                    | 45–64                                     | 0             | 12                   | 603                       | total protein, animal protein,<br>plant protein, total fat,<br>carbohydrates   | Q4 vs Q1                                        | NA              | NA            | 167              | 8            |
| Trichopoulou et<br>al., 2007 <sup>11</sup>          | EPIC                                                                                | Greece                | 20–86                                     | 59            | 4.9                  | 22944                     | carbohydrates                                                                  | per increasing<br>decile of protein<br>intake   | 455             | NA            | NA               | 6            |
| Halbesma et al.,<br>2009 <sup>121</sup>             | NA                                                                                  | Netherlands           | 20-75                                     | 50            | 6.4                  | 16922                     | total protein                                                                  | Q5 vs Q1                                        | 443             | NA            | NA               | 9            |
| Bates et al.,<br>2010 <sup>122</sup>                | The community living<br>population of Britain                                       | UK                    | 76.7                                      | 50.2          | 14                   | 1100                      | total protein, total fat                                                       | neutral value of 0.5                            | 749             | 199           | NA               | 9            |
| Fung et<br>al., 2010 <sup>9</sup>                   |                                                                                     | US                    | 34–59                                     | 100           | 26                   | 85168                     | Carbohydrates                                                                  | D10 vs D1                                       | 12555           | 2458          | 5780             | 8            |
| Preis et<br>al., 2010 <sup>123</sup>                |                                                                                     | US                    | 40–75                                     | 0             | 20                   | 44548                     | Carbohydrates                                                                  | D10 vs D1                                       | 8678            | 2746          | 2960             |              |
| Yamagishi et<br>al., 2010 <sup>124</sup>            |                                                                                     | HPFS                  | European<br>countries                     | 40-75         | 0                    | 18                        | 43960                                                                          | total protein, animal protein,<br>plant protein | Q5 vs Q1        | NA            | 1155             | NA           |
| Chiueve et<br>al., 2012 <sup>127</sup>              | JACC                                                                                | Japan                 | 40-79                                     | 60.6          | 14.1                 | 58453                     | SFA                                                                            | Q5 vs Q1                                        | NA              | 979           | NA               | 9            |
| Dilis et<br>al., 2012 <sup>47</sup>                 | NHS                                                                                 | US                    | 34-59                                     | 100           | 30+                  | 91981                     | total fat, SFA, MUFA, PUFA                                                     | Q5 vs Q1                                        | 385             | NA            | NA               | 8            |
| Nagata et al.,<br>2012 <sup>130</sup>               | The EPIC cohort                                                                     | Greek                 | 20-86                                     | 59.3          | 10                   | 23929                     | total fat, SFA, MUFA, PUFA                                                     | T3 vs T1                                        | NA              | 240           | NA               | 8            |
| Nilsson et al.,<br>2012 <sup>8</sup>                | the Takayama Study                                                                  | Japan                 | ≥35                                       |               | 16                   | 28356                     | total fat, SFA, MUFA, PUFA                                                     | Q5 vs Q1                                        | 4616            | 1429          | 1401             | 8            |
| Argos et al.,<br>2013 <sup>133</sup>                | Västerbotten<br>Intervention Program                                                | Sweden                | 49                                        | 51            | 10                   | 77319                     | total protein, carbohydrates                                                   | NA                                              | 2383            | 681           | 975              | 8            |
| Levine et al.,<br>2014 <sup>139</sup>               | HEALS                                                                               | Bangladesh            | 36.9                                      | 62.1          | 9                    | 17244                     | total protein, total fat,<br>carbohydrates                                     | Q3 vs Q1                                        | 818             | NA            | 135              | 7            |
| Miyagawa et<br>al., 2014 <sup>140</sup>             | NHANES III                                                                          | US                    | 64.8                                      | 55.4          | 13.1                 | 6381                      | total protein                                                                  | Q3 vs Q1                                        | 2553            | 1212          | 638              | 8            |
| Rebello et<br>al., 2014 <sup>141</sup>              | NIPPON DATA                                                                         | Japan                 | 50                                        | 56.2          | 24                   | 9190                      | n-3 PUFA                                                                       | Q4 vs Q1                                        | 2551            | 879           | NA               | 8            |
| Wakai et<br>al., 2014 <sup>67</sup>                 | Singapore Chinese<br>Health Study                                                   | Singapore             | 45-74                                     | 56            | 15                   | 53469                     | carbohydrates                                                                  | Q5 vs Q1                                        | NA              | 1660          | NA               | 8            |
| Campmans-<br>Kuipers et al.,<br>2015 <sup>143</sup> | JACC                                                                                | Japan                 | 56                                        | 60.6%         | 19.3                 | 58672                     | total fat, SFA, MUFA, PUFA                                                     | Q5 vs Q1                                        | 11656           | 3393          | 4241             | 8            |
| Guasch-Ferré et<br>al., 2015 <sup>62</sup>          | NA                                                                                  | European<br>countries | 57.5                                      | 44.8          | 9.4                  | 4082                      | total protein, animal protein,<br>plant protein, total fat, SFA,<br>MUFA, PUFA | Per 5% increase                                 | 787             | 266           | NA               | 7            |
| Li et al., 2015 <sup>145</sup>                      | the PREDIMED study                                                                  | Spain                 | 67±6                                      | 57.5          | 6                    | 7038                      | total fat, SFA, MUFA, PUFA                                                     | Q5 vs Q1                                        | 516             | 102           | NA               | 8            |
| Nagata et<br>al., 2015 <sup>146</sup>               | NHS                                                                                 | US                    | 30-55                                     | 100           | 30                   | 84628                     | total fat, SFA, MUFA, PUFA                                                     | Q5 vs Q1                                        | NA              | 2736          | NA               | 8            |
|                                                     | HPFS                                                                                | US                    | 40-75                                     | 0             | 24                   | 42908                     |                                                                                |                                                 |                 |               |                  |              |
|                                                     | the Takayama Study                                                                  | Japan                 | 35-101                                    | 54            | 16                   | 29079                     | total protein, animal protein,<br>plant protein                                | Q4 vs Q1                                        | NA              | 677           | NA               | 8            |

Supplemental Table S5 | Continued

| author,<br>publication year                  | Study cohort/<br>populations | Country       | baseline age<br>(years, mean or<br>range) | female<br>(%) | Follow-up<br>(years) | number of<br>participants | Exposure                                     | Quantity (Highest<br>vs Lowest Intake)                              | Number of death |               |                  | NOS<br>score |
|----------------------------------------------|------------------------------|---------------|-------------------------------------------|---------------|----------------------|---------------------------|----------------------------------------------|---------------------------------------------------------------------|-----------------|---------------|------------------|--------------|
|                                              |                              |               |                                           |               |                      |                           |                                              |                                                                     | All deaths      | CVD<br>deaths | Cancer<br>deaths |              |
| Puaschitz et al., 2015 <sup>147</sup>        | WENBIT                       | Norway        | 61.7                                      | 19            | 4.8                  | 2412                      | SFA                                          | Q4 vs Q1                                                            | 137             | NA            | NA               | 8            |
| Courand et al., 2016 <sup>149</sup>          | The OLD-HTA Lyon cohort      | France        | 45.1                                      | 42.1          | 10                   | 1128                      | total protein                                | Q3 vs Q1                                                            | 289             | 202           | NA               | 6            |
| Hernández-Alonso et al., 2016 <sup>150</sup> | PREDIMED                     | Spain         | 55-80                                     | 57.4          | 4.6                  | 7216                      | total protein, animal protein, plant protein | Q5 vs Q1                                                            | 323             | 81            | 130              | 8            |
| Owen et al., 2016 <sup>151</sup>             | AusDiab Study                | Australia     | ≥25                                       | 55            | 12.6                 | 11247                     | n-3 PUFA, n-6 PUFA                           | Q5 vs Q1                                                            | 1265            | 277           | NA               | 8            |
| Song et al., 2016 <sup>153</sup>             | NHS, HPFS                    | US            | 49                                        | 64.7          | 27                   | 131342                    | animal protein, plant protein                | Q5 vs Q1                                                            | 36115           | 8851          | 13159            | 8            |
| Wang et al., 2016 <sup>28</sup>              | NHS<br>HPFS                  | US<br>US      | 30-55<br>40-75                            | 100<br>0      | 30+<br>24            | 83349<br>42884            | total fat, SFA, MUFA, PUFA                   | Q5 vs Q1<br>Q5 vs Q1                                                | 20314<br>12990  | 3960<br>3025  | 7018<br>4192     | 8            |
| Dehghan et al., 2017 <sup>13</sup>           | PURE                         | 18 countries* | 50.29 ±9.92, 35-70                        | 58.3          | 7.4                  | 135335                    | total protein, total fat, carbohydrates      | Q5 vs Q1                                                            | 5796            | 4784          | NA               | 8            |
| Holmes et al., 2017 <sup>156</sup>           | NHS                          | US            | 30-55                                     | 100           | 29                   | 6348                      | animal protein, plant protein                | Q5 vs Q1                                                            | NA              | NA            | 919              | 7            |
| Rhee et al., 2017 <sup>157</sup>             | WHS                          | US            | 45+                                       | 100           | 21                   | 38392                     | α-Linolenic acid, Marine omega-3 fatty acids | Q5 vs Q1                                                            | NA              | 501           | NA               | 7            |
| Zaslavsky et al., 2017 <sup>158</sup>        | WHI                          | US            | 65-84                                     | 100           | 12.4                 | 10034                     | total protein                                | Q4 vs Q1                                                            | 3529            | NA            | NA               | 7            |
| Arthur et al., 2018 <sup>160</sup>           | UM HN-SPORE                  | US            | 60.9 ±11                                  | 0.1           | 2.2                  | 414                       | total protein, total fat, carbohydrates      | high vs low                                                         | 70              | NA            | NA               | 7            |
| Ricci et al., 2018 <sup>161</sup>            | NHANES                       | US            | ≥30 y                                     | 50.6          | 6.1                  | 18372                     | SFA, MUFA, PUFA                              | Q3 vs Q1                                                            | 1118            | 267           | 289              | 8            |
| Seidemann et al., 2018 <sup>14</sup>         | ARIC                         | US            | 45–64                                     | 56            | 25                   | 15428                     | carbohydrates                                | Q5 vs Q1                                                            | 6283            | NA            | NA               | 8            |
| Song et al., 2018 <sup>162</sup>             | NHS, HPFS                    | US            | 30-75                                     | 59.6          | 9                    | 1542                      | animal protein, plant protein                | animal protein per 3.4 % increase, plant protein per 1.4 % increase | 817             | NA            | 185              | 8            |
| Tharrey et al., 2018 <sup>163</sup>          | AHS-2                        | US and Canada | > 25                                      | NA            | 9.4                  | 81337                     | animal protein, plant protein                | 18-g increase                                                       | NA              | 2276          | NA               | 8            |
| Budhathoki et al., 2019 <sup>18</sup>        | JPHC                         | Japan         | 55.7                                      | 54.5          | 18                   | 70696                     | total protein, animal protein, plant protein | Q5 vs Q1                                                            | 12381           | 3025          | 5055             | 8            |
| Chan et al., 2019 <sup>164</sup>             | NA                           | China         | >65                                       | 51            | 13.8                 | 3020                      | total protein, animal protein, plant protein | Q5 vs Q1                                                            | 963             | 205           | 336              | 7            |
| Jiao et al., 2019 <sup>165</sup>             | NHS<br>HPFS                  | US<br>US      | 30-55<br>40-75                            | 100<br>0      | 11<br>11             | 9053<br>2211              | SFA, MUFA, PUFA                              | Q4 vs Q1<br>Q4 vs Q1                                                | 2502            | 646           |                  | 8            |
| Kurihara et al., 2019 <sup>166</sup>         | NIPPONDATA 90                | Japan         | 52.6                                      | 58.4          | 13.9                 | 7744                      | plant protein                                | Q4 vs Q1                                                            | 1213            | 354           | NA               | 8            |
| Mazidi et al., 2019 <sup>167</sup>           | NHANES 1999–2010             | US            | 47.6                                      | 51.4          | 12                   | 24825                     | Low-Carbohydrate-Diet Scores                 | Q4 vs Q1                                                            | 3432            | 709           | 827              | 9            |
| Papanikolaou et al., 2019 <sup>19</sup>      | NHANES III                   | US            | 19-99                                     | 50            | 18                   | 34398                     | animal protein, plant protein                | NA                                                                  | 4280            | NA            | NA               | 8            |
| Virtanen et al., 2019 <sup>17</sup>          | KIHD                         | Finland       | 52.7–53.7                                 | 0             | 22.31                | 2641                      | total protein, animal protein, plant protein | Q4 vs Q1                                                            | 1225            | 618           | 347              | 7            |
| Zhuang et al., 2019 <sup>54</sup>            | CHNS (1989–2011)             | China         | 41.3                                      | 54.8          | 14                   | 14383                     | SFA                                          | Q4 vs Q1                                                            | 1011            | NA            | NA               | 7            |

Supplemental Table S5 | Continued

| author,<br>publication year             | Study cohort/<br>populations          | Country     | baseline age<br>(years, mean or<br>range) | female<br>(%) | Follow-up<br>(years) | number of<br>participants | Exposure                                                                                                 | Quantity (Highest<br>vs Lowest Intake) | Number of death |               |                  | NOS<br>score |
|-----------------------------------------|---------------------------------------|-------------|-------------------------------------------|---------------|----------------------|---------------------------|----------------------------------------------------------------------------------------------------------|----------------------------------------|-----------------|---------------|------------------|--------------|
|                                         |                                       |             |                                           |               |                      |                           |                                                                                                          |                                        | All deaths      | CVD<br>deaths | Cancer<br>deaths |              |
| Zhuang et<br>al.,2019 <sup>68</sup>     | CHNS                                  | China       | NA                                        | NA            | 14                   | 14117                     | PUFA                                                                                                     | Q4 vs Q1                               | 1007            | NA            | NA               | 8            |
|                                         | NHANES                                | US          | NA                                        | NA            | 14                   | 36032                     | PUFA                                                                                                     | Q4 vs Q1                               | 4826            | NA            | NA               |              |
| Zhuang et<br>al.,2019 <sup>63</sup>     | The NIH-AARP Diet<br>and Health Study | US          | 50-71                                     | 41.2          | 16                   | 521120                    | SFA, MUFA, PUFA                                                                                          | Q5 vs Q1                               | 129328          | NA            | NA               | 7            |
| Chen et<br>al.,2020 <sup>25</sup>       | The Rotterdam Study                   | Netherlands | 63.5                                      | 60.8          | 13                   | 7786                      | total protein, animal protein,<br>plant protein                                                          | Q4 vs Q1                               | 3589            | 877           | 896              | 9            |
| Ho et al., 2020 <sup>169</sup>          | UK Biobank                            | UK          | 56.15±7.94                                | 55.9          | 10.6                 | 195658                    | total protein, SFA, MUFA,<br>PUFA                                                                        | high vs low                            | NA              | NA            | NA               | 9            |
| Huang et<br>al.,2020 <sup>170</sup>     | The NIH-AARP Diet<br>and Health Study | US          | F:62.0(5.4);<br>M:62.2(5.4)               | 43.0          | 16                   | 416104                    | plant protein                                                                                            | Per 10 g/1000 kcal<br>increment        | 77614           | 22228         | 10283            | 8            |
| Langsetmo et<br>al.,2020 <sup>171</sup> | MrOS study                            | US          | 73.6±5.8                                  | 0.6           | 10                   | 5790                      | protein                                                                                                  | low vs high                            | 1611            | 587           | 473              | 7            |
| Lelli et<br>al.,2020 <sup>172</sup>     | the longitudinal In<br>CHIANTI study  | Italy       | 75±7.3                                    | 55            | 9                    | 927                       | PUFA/total lipid                                                                                         | Q4 vs Q1                               | NA              | NA            | NA               | 7            |
| Lin et al.,<br>2020 <sup>173</sup>      | CMUH                                  | China       | NA                                        | NA            | 7.4                  | 15289                     | carbohydrates                                                                                            | NA                                     | 2784            |               | NA               | 6            |
| Mao et al.,<br>2020 <sup>174</sup>      | CHNS                                  | China       | ≥20                                       | NA            | 14                   | 14305                     | MUFA                                                                                                     | Q4 vs Q1                               | 1006            | NA            | NA               | 9            |
| Mazidi et<br>al.,2020 <sup>50</sup>     | NHANES 1999-2010                      | US          | 49.6                                      | 51.5          | 12                   | 24144                     | total fat, SFA, MUFA, PUFA                                                                               | Q4 vs Q1                               | 3632            | 714           | NA               | 9            |
| Mendonça et<br>al.,2020 <sup>175</sup>  | The Newcastle 85+<br>Study            | US          | ≥85                                       | 59.7          | 5                    | 717                       | total protein                                                                                            | Q3 vs Q1                               | 457             | NA            | NA               | 7            |
| Miyazawa et<br>al.,2020 <sup>177</sup>  | NIPPON DATA                           | Japan       | 30-79                                     | 56.1          | 24                   | 8925                      | carbohydrates                                                                                            | Q4 vs Q1                               | NA              | 823           | NA               | 8            |
| Shan et<br>al.,2020 <sup>178</sup>      | NHANES (1999-2014)                    | US          | 49.7 ±18.3                                | 52.6          | 8                    | 37233                     | Low-Carbohydrate-Diet<br>Scores                                                                          | Q5 vs Q1                               | 4866            | 849           | 1068             | 8            |
| Trevisan et<br>al.,2020 <sup>179</sup>  | The Alpines Project                   | Italy       | 48.6                                      | 0             | 7                    | 5049                      | total protein, animal protein,<br>plant protein, total fat, SFA,<br>MUFA, PUFA, animal fat,<br>plant fat | Q4 vs Q1                               | 291             | NA            | NA               | 6            |
| Akter et al.,<br>2021 <sup>180</sup>    | JPHC                                  | Japan       | NA                                        | 54.1          | 16.9                 | 93654                     | Low-Carbohydrate-Diet<br>Scores                                                                          | Q5 vs Q1                               | 13179           | 3450          | 5246             | 8            |
| Kwon et<br>al.,2021 <sup>181</sup>      | KoGES                                 | Korea       | 53.8                                      | 65.3          | 8.15                 | 194295                    | total fat                                                                                                | Q5 vs Q1                               | 3866            | NA            | NA               | 7            |
| Sun et al.,<br>2021 <sup>183</sup>      | WHI                                   | US          | 50-79                                     | 100           | 18.1                 | 102521                    | animal protein, plant protein                                                                            | Q5 vs Q1                               | 25976           | 6993          | 7516             | 7            |
| Yao et al.,<br>2021 <sup>184</sup>      | PLCO cancer<br>screening trial        | Korea       | 62.4±5.3                                  | 51.4          | 17                   | 101832                    | total fat,SFA,MUFA,PUFA                                                                                  | Q5 vs Q1                               | 24141           | 7534          | 7161             | 7            |

#### Abbreviations:

SACCR: the South Australian Central Cancer Registry; NHANES: National Health and Nutrition Examination Survey; HPFS: The Health Professionals Follow-up Study; NHS: The Nurses' Health Study cohort. AHS: The Adult Health Study; ILSA: Italian Longitudinal Study on Aging' study; BLSA: the Baltimore Longitudinal Study of Aging; EPIC: European Prospective Investigation into Cancer and Nutrition Study; JACC: the Japan Collaborative Cohort Study; PRHHP: The Puerto Rico Heart Health Program; HEALS: the Health Effects of Arsenic Longitudinal Study; NIPPON DATA: The National Integrated Project for Prospective Observation of Non-communicable Disease And its Trends in the Aged; WENBIT: the Western Norway B-Vitamin Intervention Trial; PREDIMED : PREvención con DIeta MEDiterránea cohort; AusDiab: The Australian Diabetes, Obesity and Lifestyle Study; PURE: The Prospective Urban Rural Epidemiology study; WHS: the Women's Health Study; WHI: The Women's Health Initiative; AHS: The Adventist Health Study; JPHC: Japan Public Health Center-based Prospective Cohort Study; UM HN-SPORE: the University of Michigan Head and Neck Specialized Program of Research Excellence; NIPPONDATA90: The National Integrated Project for Prospective Observation of Non-communicable Disease and Its Trends in the Age 1990; KIHD: The Kuopio Ischaemic Heart Disease Risk Factor Study ; CHNS: the China Health and Nutrition Survey; NIH-AARP: National Institutes of Health-AARP; CMUH: China Medical University Hospital; AusDiab Study: The Australian Diabetes, Obesity and Lifestyle Study; CHNS: the China Health and Nutrition Survey; MrOS study: multicenter Osteoporotic Fractures in Men study; NIPPON DATA: The National Integrated Project for Prospective Observation of Non-communicable Disease and its Trends in the Aged ; KoGES: the Korean Genome and Epidemiology Study; PLCO cancer screening trial: the Prostate, Lung, Colorectal, and Ovarian cancer screening trial. \*from 18 countries, three high-income (Canada, Sweden, and United Arab Emirates), 11 middle-income (Argentina, Brazil, Chile, China, Colombia, Iran, Malaysia, occupied Palestinian territory, Poland, South Africa, and Turkey) and four low-income countries (Bangladesh, India, Pakistan, and Zimbabwe).

**Table S6.** Variety of Macronutrients intake assessment and outcome methods

| author, publication year                                          | Diet assessment method                                        | Outcome assessment method                                                                                                                                                                                                                               |
|-------------------------------------------------------------------|---------------------------------------------------------------|---------------------------------------------------------------------------------------------------------------------------------------------------------------------------------------------------------------------------------------------------------|
| <b>Protein Intake with All-Cause and Cause-Specific Mortality</b> |                                                               |                                                                                                                                                                                                                                                         |
| Rohan et al.,1993                                                 | Self-administered FFQ                                         | Determine the patient's life status by linking the research files with the files saved by SACCR through computer records                                                                                                                                |
| Dwyer et al.,1994                                                 | 24-Hour Food Consumption Intake                               | The records of participants' mortality were obtained by linkage to the National Death                                                                                                                                                                   |
| Esrey et al.,1996                                                 | 24-Hour Food Consumption Intake                               | The records of participants' mortality were obtained by CDC and NCHS                                                                                                                                                                                    |
| Payette et al.,1999                                               | 3-day weighted food records of 3 consecutive days of the week | CLSC in combination with information from medical, hospital, or nursing home records and surveillance of obituaries. Official death certificates (Ministere de la Sante et des Services Sociaux[MSSS], Quebec) were obtained for confirmation of death. |
| Holmes et al.,1999                                                | Validated, semi-quantitative 126-item FFQ                     | Medical record, autopsy report, death certificate, US postal system, state vital statistics departments, National Death Index.                                                                                                                          |
| Palli et al.,2000                                                 | Self-administered FFQ                                         | Vital status information was sought for all patients by periodic linkage to Municipal Population Offices and to the Regional Mortality Registry on December 31,1997.                                                                                    |
| Sauvaget et al.,2004                                              | 24-Hour Food Consumption Intake                               | Vital status was ascertained by linkage to the nationwide family registration system of Japan.                                                                                                                                                          |
| Borugian et al.,2004                                              | Self-administered FFQ                                         | outcomes were ascertained by linkage to the BC Cancer Registry after 10 years of follow-up.                                                                                                                                                             |
| Kelemen et al.,2005                                               | Self-administered FFQ                                         | Death certificates. Residencial registry to confirm residence status                                                                                                                                                                                    |
| Solfrizzi et al.,2005                                             | Validated, semi-quantitative 77-item FFQ                      | Death certificates. Residencial registry to confirm residence status                                                                                                                                                                                    |
| Smit et al.,2007                                                  | 24-Hour Food Consumption Intake                               | participants in the PRHHP with the Puerto Rico Cancer Registry and Puerto Rico Vital Statistics Registry.                                                                                                                                               |
| Lagiou et al.,2007                                                | Self-administered FFQ                                         | Linkages with the Swedish nationwide health registers, by means of the unique per individual Swedish national registration number, were used for the follow up of the cohort with respect to death and emigration.                                      |
| Halbesma et al.,2009                                              | Self-administered FFQ                                         | Data on mortality were received through the municipal register. Cause of death was obtained by linking the number of the death certificate to the primary cause of death as coded by the Dutch Central Bureau of Statistics.                            |
| Bates et al.,2010                                                 | 24-Hour Food Consumption Intake                               | Death certificates. Residencial registry to confirm residence status                                                                                                                                                                                    |
| Preis et al.,2010                                                 | Validated, semi- quantitative 126- item FFQ                   | Medical record, autopsy report, death certificate, US postal system, state vital statistics departments, National Death Index.                                                                                                                          |
| Nilsson et al.,2012                                               | Self-administered FFQ                                         | Mortality end-points were identified by linking the VIP database with the Swedish national cause-of-death registry                                                                                                                                      |
| Argos et al.,2013                                                 | Self-administered FFQ                                         | Death certificates. Residencial registry to confirm residence status                                                                                                                                                                                    |



|                               |                                              |                                                                                                                                                                                                                                                                                                                                                    |
|-------------------------------|----------------------------------------------|----------------------------------------------------------------------------------------------------------------------------------------------------------------------------------------------------------------------------------------------------------------------------------------------------------------------------------------------------|
| Levine et al.,2014            | 24-h dietary recalls by trained interviewers | Dietary data and mortality data were linked using different institutional database: WWEIA; NCHS; NDI                                                                                                                                                                                                                                               |
| Nagata et al.,2015            | Self-administered FFQ                        | Death certificates. Residential registry to confirm residence status                                                                                                                                                                                                                                                                               |
| Campmans-Kuijpers et al.,2015 | Self-administered FFQ                        | Information on vital status, cause and date of death, were obtained by using follow-up mailings and subsequent inquiries to municipal registries, regional health departments, physicians, or by record linkages with local, regional, or central cancer registries, boards of health, or hospitals (Germany), or death indexes (other countries). |
| Courand et al.,2016           | Self-administered FFQ                        | Deaths at 10 years of follow-up were obtained from the Répertoire National d'Identification des Personnes Physiques (a directory maintained by the Institut National de la Statistique et des Etudes Economiques).                                                                                                                                 |
| Hernández-Alonso et al.,2016  | Validated, semi-quantitative 137-item FFQ    | Death certificates. Residential registry to confirm residence status                                                                                                                                                                                                                                                                               |
| Song et al.,2016              | Validated, semi- quantitative 126- item FFQ  | Medical record, autopsy report, death certificate, US postal system, state vital statistics departments, National Death Index.                                                                                                                                                                                                                     |
| Holmes et al.,2017            | Validated, semi- quantitative 126- item FFQ  | Medical record, autopsy report, death certificate, US postal system, state vital statistics departments, National Death Index.                                                                                                                                                                                                                     |
| Zaslavsky et al.,2017         | Self-administered FFQ                        | Participants' deaths were adjudicated by study physicians with the use of hospital records, autopsy or coroner reports, and/or death certificates                                                                                                                                                                                                  |
| Dehghan et al.,2017           | Self-administered FFQ                        | Death certificates.<br>Residential registry to confirm residence status                                                                                                                                                                                                                                                                            |
| Arthur et al.,2018            | Self-administered FFQ                        | Deaths were captured through the Social Security Death Index, yearly survey updates, notification from family or medical record reviews                                                                                                                                                                                                            |
| Tharrey et al.,2018           | Self-administered FFQ                        | biennial follow-up of participants and linkage with the National Death Index                                                                                                                                                                                                                                                                       |
| Song et al.,2018              | Validated, semi- quantitative 126- item FFQ  | Medical record, autopsy report, death certificate, US postal system, state vital statistics departments, National Death Index.                                                                                                                                                                                                                     |
| Mendonça et al.,2020          | 24-h dietary recalls by trained interviewers | Information on date of death was obtained from NHS Digital, UK.                                                                                                                                                                                                                                                                                    |
| Kurihara et al.,2019          | 24-h dietary recalls by trained interviewers | Medical record, autopsy report, death certificate, US postal system, state vital statistics departments, National Death Index.                                                                                                                                                                                                                     |
| Virtanen et al.,2019          | 4-d dietary records                          | Deaths were ascertained by a computer linkage to the national Causes of Death Register with the use of the Finnish personal identification code (social security number).                                                                                                                                                                          |
| Budhathoki et al.,2019        | Self-administered FFQ                        | Residential and vital statuses of cohort participants during follow-up were determined annually through the residential registry.                                                                                                                                                                                                                  |
| Chan et al.,2019              | Self-administered FFQ                        | Mortality data were ascertained from the Hong Kong Government Death Registry.                                                                                                                                                                                                                                                                      |
| Ho et al.,2020                | 24-h dietary recalls by trained interviewers | Date of death was obtained from death certificates held within the NHS Information Centre (England and Wales) and the NHS Central Register Scotland (Scotland).                                                                                                                                                                                    |
| Langsetmo et al.,2020         | Self-administered FFQ                        | Deaths were reported by proxy respondent and were confirmed with hospital discharge records and/or death certificate.                                                                                                                                                                                                                              |

|                                                               |                                                                |                                                                                                                                                                                                                                                                           |
|---------------------------------------------------------------|----------------------------------------------------------------|---------------------------------------------------------------------------------------------------------------------------------------------------------------------------------------------------------------------------------------------------------------------------|
| Chen et al.,2020                                              | <b>a semi-quantitative food questionnaire (FFQ)</b>            | Information on vital status of the participants was obtained from clinical follow-up data collection and from municipal records.                                                                                                                                          |
| Huang et al.,2020                                             | Diet History Questionnaire                                     | Vital status of participants was ascertained via linkage with the Social Security Administration Death Master File, and specific causes of death were identified through linkage with the National Death Index Plus, updated by the National Center for Health Statistics |
| Trevisan et al.,2020                                          | Self-administered FFQ                                          | Deaths were reported by proxy respondent and were confirmed with hospital discharge records and/or death certificate.                                                                                                                                                     |
| Sun et al.,2021                                               | Self-administered FFQ                                          | Deaths were ascertained by reviewing death certificates, medical records, autopsy reports, or by linkage to the National Death Index                                                                                                                                      |
| <b>Protein Intake with CVD Morbidity</b>                      |                                                                |                                                                                                                                                                                                                                                                           |
| Hu et al.,1999                                                | Validated, semi-quantitative 126- item FFQ                     | Self-reported                                                                                                                                                                                                                                                             |
| Zhang et al.,2003                                             | Self-administered FFQ                                          | Self-reported                                                                                                                                                                                                                                                             |
| Iso et al.,2001                                               | Validated, semi- quantitative 126- item FFQ                    | Hospital Discharge Register                                                                                                                                                                                                                                               |
| Larsson et al.,2012                                           | Validated, semi-quantitative 96- item FFQ                      | ascertained by linkage of the study cohort to the Swedish Hospital Discharge Registry, which provides virtually complete national coverage                                                                                                                                |
| Preis et al.,2010                                             | Validated, semi-quantitative 131- item FFQ                     | participant reported a diagnosis and hospitalization for MI                                                                                                                                                                                                               |
| Wallstrom et al.,2012                                         | an interview-based, modified diet history method that combined | Self-reported                                                                                                                                                                                                                                                             |
| Haring et al.,2014                                            | Validated, semi-quantitative 66- item FFQ                      | CHD events were identified and adjudicated using information from study visits, yearly telephone follow-up calls, review of hospital discharge lists and medical charts, death certificates, next-of-kin interviews, and physician-completed questionnaires               |
| Xu et al.,2016                                                | 7-day dietary record                                           | The Swedish National vital status registry and Swedish National Hospital discharge register were used to identify CVD events (identified by ICD-9 codes 390–459 or ICD-10 codes I00–I99), and were thereafter validated by inspection of medical records.                 |
| Dehghan et al.,2017                                           | Self-administered FFQ                                          | Death certificates. Residential registry to confirm residence status                                                                                                                                                                                                      |
| Okada et al.,2019                                             | 24-h dietary recalls by trained interviewers                   | Death certificates, national insurance claims, reports from local physicians, reports from public health nurses and health volunteers, and an annual cardiovascular risk survey were used to ascertain the endpoint of stroke.                                            |
| <b>Fat Intake with All-Cause and Cause-Specific Mortality</b> |                                                                |                                                                                                                                                                                                                                                                           |
| Posner et al.,1991                                            | 24-Hour Food Consumption Intake                                | Medical record, autopsy report, death certificate, US postal system, state vital statistics departments, National Death Index.                                                                                                                                            |
| Rohan et al.,1993                                             | Self-administered FFQ                                          | Determine the patient's life status by linking the research files with the files saved by SACCR through computer records                                                                                                                                                  |

|                          |                                                            |                                                                                                                                                                                            |
|--------------------------|------------------------------------------------------------|--------------------------------------------------------------------------------------------------------------------------------------------------------------------------------------------|
| Esrey et al.,1996        | 24-Hour Food Consumption Intake                            | The records of participants' mortality were obtained by CDC and NCHS                                                                                                                       |
| Mann et al.,1997         | Self-administered FFQ                                      | Flagging of each subject's medical records at the National Health Service Central Register enabled death certificates to be sent to the investigators following the death of participants. |
| Pietinen et al.,1997     | Self-administered FFQ                                      | Data on nonfatal myocardial infarction were obtained from the National Hospital Discharge Register.                                                                                        |
| Boniface et al.,2002     | Self-administered FFQ                                      | Death certificates. Residential registry to confirm residence status                                                                                                                       |
| Palli et al.,2000        | Self-administered FFQ                                      | Vital status information was sought for all patients by periodic linkage to Municipal Population Offices and to the Regional Mortality Registry on December 31,1997.                       |
| Hu et al.,2003           | Validated, semi-quantitative 126- item FFQ                 | Medical record, autopsy report, death certificate, US postal system, state vital statistics departments, National Death Index.                                                             |
| Borugian et al.,2004     | Self-administered FFQ                                      | outcomes were ascertained by linkage to the BC Cancer Registry after 10 years of follow-up.                                                                                                |
| Sauvaguet et al.,2004    | 24-Hour Food Consumption Intake                            | Vital status was ascertained by linkage to the nationwide family registration system of Japan.                                                                                             |
| Solfrizzi et al.,2005    | Validated, semi-quantitative 77-item FFQ                   | Death certificates. Residential registry to confirm residence status                                                                                                                       |
| Leosdottir et al.,2005   | Self-administered FFQ                                      | Information on prior medical history was acquired from the questionnaire (for diabetes) and from local or national registries (for diagnosis of cancer, myocardial infarction, or stroke). |
| Tucker et al.,2005       | 7-d diet record                                            | Death certificates. Residential registry to confirm residence status                                                                                                                       |
| Xu et al.,2006           | 24-h dietary recall                                        | CHD events that occurred during the follow-up period were ascertained from the annual mortality and morbidity surveillance or at the third examination (1998–1999)                         |
| Trichopoulou et al. 2007 | Self-administered FFQ                                      | Death certificates. Residential registry to confirm residence status                                                                                                                       |
| Smit et al.,2007         | 24-Hour Food Consumption Intake                            | Death certificates. Residential registry to confirm residence status                                                                                                                       |
| Bates et al.,2010        | 24-Hour Food Consumption Intake                            | Death certificates. Residential registry to confirm residence status                                                                                                                       |
| Yamagishi et al.,2010    | Self-administered FFQ                                      | all deaths that occurred in the cohort were ascertained by death certificates from a public health center                                                                                  |
| Dilis et al.,2012        | a validated interviewer-administered semi-quantitative FFQ | Self-reporting of a CHD event during the follow-up was confirmed through hospital discharge data, medical records or death certificates                                                    |
| Nagata et al.,2012       | a validated interviewer-administered semi-quantitative FFQ | confirmed with data from the National Vital Statistics provided by the Ministry of Health, Labor, and Welfare.                                                                             |
| Chiuve et al.,2012       | Validated, semi- quantitative 126- item FFQ                | Medical record, autopsy report, death certificate, US postal system, state vital statistics departments, National Death Index.                                                             |
| Argos et al.,2013        | Self-administered FFQ                                      | Death certificates. Residential registry to confirm residence status                                                                                                                       |
| Wakai et al.,2014        | Self-administered FFQ                                      | We used population registries from the involved municipalities to determine the vital and residential status of participants.                                                              |
| Miyagawa et al.,2014     | Self-administered FFQ                                      | Death certificates.<br>Residential registry to confirm residence status                                                                                                                    |
| Puaschitz et al.,2015    | a semiquantitative FFQ                                     | Clinical data were obtained from hospitals and information on deaths from the Norwegian Cause of Death Registry                                                                            |

|                               |                                              |                                                                                                                                                                                                                                                                                                                                                    |
|-------------------------------|----------------------------------------------|----------------------------------------------------------------------------------------------------------------------------------------------------------------------------------------------------------------------------------------------------------------------------------------------------------------------------------------------------|
| Owen et al.,2016              | Validated, semi- quantitative 126- item FFQ  | Death certificates. Residencial registry to confirm residence status                                                                                                                                                                                                                                                                               |
| Guasch-Ferré et al.,2015      | Self-administered FFQ                        | Death certificates. Residencial registry to confirm residence status                                                                                                                                                                                                                                                                               |
| Campmans-Kuijpers et al.,2015 | Self-administered FFQ                        | Information on vital status, cause and date of death, were obtained by using follow-up mailings and subsequent inquiries to municipal registries, regional health departments, physicians, or by record linkages with local, regional, or central cancer registries, boards of health, or hospitals (Germany), or death indexes (other countries). |
| Li et al.,2015                | Validated, semi- quantitative 126- item FFQ  | Medical record, autopsy report, death certificate, US postal system, state vital statistics departments, National Death Index.                                                                                                                                                                                                                     |
| Wang et al.,2016              | Validated, semi- quantitative 126- item FFQ  | Medical record, autopsy report, death certificate, US postal system, state vital statistics departments, National Death Index.                                                                                                                                                                                                                     |
| Rhee et al.,2017              | Self-administered FFQ                        | self-reported data on incident physician diagnoses of cardiovascular events; autopsy reports, death certificates, medical records, or information obtained from next of kin or family members                                                                                                                                                      |
| Dehghan et al.,2017           | Self-administered FFQ                        | Death certificates. Residencial registry to confirm residence status                                                                                                                                                                                                                                                                               |
| Ricci et al.,2018             | 24-h dietary recalls by trained interviewers | Dietary data and mortality data were linked using different institutional database: WWEIA; NCHS; NDI                                                                                                                                                                                                                                               |
| Arthur et al.,2018            | Self-administered FFQ                        | Deaths were captured through the Social Security Death Index, yearly survey updates, notification from family or medical record reviews                                                                                                                                                                                                            |
| Jiao et al.,2019              | Validated, semi- quantitative 126- item FFQ  | Medical record, autopsy report, death certificate, US postal system, state vital statistics departments, National Death Index.                                                                                                                                                                                                                     |
| Zhuang et al.,2019 b          | 3 consecutive 24-h dietary recalls           | Death status was ascertained by the report of household members in each survey.                                                                                                                                                                                                                                                                    |
| Zhuang et al.,2019 a          | Self-administered FFQ                        | Medical record, autopsy report, death certificate, US postal system, state vital statistics departments, National Death Index.                                                                                                                                                                                                                     |
| Zhuang et al.,2019 c          | 24-h dietary recalls by trained interviewers | Dietary data and mortality data were linked using different institutional database: WWEIA; NCHS; NDI                                                                                                                                                                                                                                               |
| Mao et al.,2020               | 3 consecutive 24-h dietary recalls           | The death date in every round of survey was recorded based on the report of household members in each survey and denoted in CHNS database.                                                                                                                                                                                                         |
| Lelli et al.,2020             | Self-administered FFQ                        | mortality registers after a 9-year follow-up                                                                                                                                                                                                                                                                                                       |
| Ho et al.,2020                | 24-h dietary recalls by trained interviewers | Date of death was obtained from death certificates held within the NHS Information Centre (England and Wales) and the NHS Central Register Scotland (Scotland).                                                                                                                                                                                    |
| Mazidi et al.,2020            | 24-h dietary recalls by trained interviewers | Dietary data and mortality data were linked using different institutional database: WWEIA; NCHS; NDI                                                                                                                                                                                                                                               |
| Trevisan et al.,2020          | Self-administered FFQ                        | Deaths were reported by proxy respondent and were confirmed with hospital discharge records and/or death certificate.                                                                                                                                                                                                                              |
| Kwon et al.,2021              | Validated, semi- quantitative 123- item FFQ  | Mortality status and causes of death were determined using publicly accessible files in the KoGES-linked National Death Index as a reference                                                                                                                                                                                                       |
| Yao et al.,2021               | Self-administered FFQ                        | Deaths were identified by annual mailed questionnaires and periodic linkage to the National Death Index.                                                                                                                                                                                                                                           |

### Fat Intake with CVD Morbidity

|                          |                                              |                                                                                                                                                                                                          |
|--------------------------|----------------------------------------------|----------------------------------------------------------------------------------------------------------------------------------------------------------------------------------------------------------|
| McGee et al.,1984        | 24-h dietary recalls by trained interviewers | Self-reported                                                                                                                                                                                            |
| Fehily et al.,1993       | Self-administered FFQ                        | Self-reported                                                                                                                                                                                            |
| Goldbourt et al.,1993    | Self-administered FFQ                        | Self-reported                                                                                                                                                                                            |
| Ascherio et al.,1995     | Validated, semi- quantitative 126- item FFQ  | Self-reported                                                                                                                                                                                            |
| Ascherio et al.,1996     | Validated, semi- quantitative 126- item FFQ  | Self-reported                                                                                                                                                                                            |
| Gillman et al.,1997      |                                              |                                                                                                                                                                                                          |
| Hu et al.,1997           | Validated, semi- quantitative 126- item FFQ  | Self-reported                                                                                                                                                                                            |
| Seino et al.,1997        | Self-administered FFQ                        | Self-reported                                                                                                                                                                                            |
| Pietinen et al.,1997     | Self-administered FFQ                        | Hospital Discharge Register                                                                                                                                                                              |
| Hu et al.,1999           | Validated, semi- quantitative 126- item FFQ  | Self-reported                                                                                                                                                                                            |
| Iso et al.,2001          | Validated, semi- quantitative 126- item FFQ  | Hospital Discharge Register                                                                                                                                                                              |
| He et al.,2003           | Self-administered FFQ                        | postal authorities or the national death index                                                                                                                                                           |
| Hu et al.,2003           | Validated, semi- quantitative 126- item FFQ  | Medical record, autopsy report, death certificate, US postal system, state vital statistics departments, National Death Index.                                                                           |
| Iso et al.,2003          | 24-h dietary recalls by trained interviewers | 1) national insurance claims, 2) reports by local physicians, 3) ambulance records, 4) death certificates, 5) reports by public health nurses and health volunteers, and 6) cardiovascular risk surveys. |
| Jakobsen et al.,2004     | a 7-day weighed food record                  | record linkage to the National Patient Registry                                                                                                                                                          |
| Tanasescu et al.,2004    | Validated, semi- quantitative 126- item FFQ  | Self-reported                                                                                                                                                                                            |
| Oh et al.,2005           | Validated, semi- quantitative 126- item FFQ  | Self-reported                                                                                                                                                                                            |
| Trichopoulou et al. 2007 | Self-administered FFQ                        | Death certificates. Residencial registry to confirm residence status                                                                                                                                     |
| Xu et al.,2006           | 24-h dietary recall                          | CHD events that occurred during the follow-up period were ascertained from the annual mortality and morbidity surveillance or at the third examination (1998–1999)                                       |
| Leosdottir et al.,2007   | a 7-day weighed food record                  | Self-reported                                                                                                                                                                                            |

|                          |                                                                                |                                                                                                                                                                                               |
|--------------------------|--------------------------------------------------------------------------------|-----------------------------------------------------------------------------------------------------------------------------------------------------------------------------------------------|
| Boden-Albala et al.,2009 | Self-administered FFQ                                                          | Hospital Discharge Register                                                                                                                                                                   |
| Yamagishi et al.,2010    | Self-administered FFQ                                                          | all deaths that occurred in the cohort were ascertained by death certificates from a public health center                                                                                     |
| Houston et al.,2011      | Self-administered FFQ                                                          | Hospital Discharge Register                                                                                                                                                                   |
| Atkinson et al.,2011     | Self-administered FFQ                                                          | Self-reported                                                                                                                                                                                 |
| Dilis et al.,2012        | a validated interviewer-administered semi-quantitative FFQ                     | Self-reporting of a CHD event during the follow-up was confirmed through hospital discharge data, medical records or death certificates                                                       |
| Wallstrom et al.,2012    | an interview-based, modified diet history method that combined                 | Self-reported                                                                                                                                                                                 |
| Larsson et al.,2012      | Validated, semi- quantitative 96- item FFQ                                     | ascertained by linkage of the study cohort to the Swedish Hospital Discharge Registry, which provides virtually complete national coverage                                                    |
| Yaemsiri et al.,2012     | Self-administered FFQ                                                          | Self-reported                                                                                                                                                                                 |
| de Oliveira et al.,2012  | Self-administered FFQ                                                          | Self-reported                                                                                                                                                                                 |
| Yamagishi et al.,2013    | Self-administered FFQ                                                          | Hospital Discharge Register                                                                                                                                                                   |
| Virtanen et al.,2014     | 24-h dietary recall                                                            | Hospital Discharge Register                                                                                                                                                                   |
| Santos et al.,2014       | a 3-day WDR technique (two nonconsecutive weekdays and one day of the weekend) | Self-reported                                                                                                                                                                                 |
| Chiuvé et al.,2015       | Self-administered FFQ                                                          | Self-reported                                                                                                                                                                                 |
| Puaschitz et al.,2015    | Self-administered FFQ                                                          | Clinical data were obtained from hospitals and information on deaths from the Norwegian Cause of Death Registry                                                                               |
| Li et al.,2015           | Validated, semi- quantitative 126- item FFQ                                    | Self-reported                                                                                                                                                                                 |
| Guasch-Ferré et al.,2015 | Self-administered FFQ                                                          | Death certificates. Residencial registry to confirm residence status                                                                                                                          |
| Chen et al.,2016         | Validated, semi- quantitative 126- item FFQ                                    | Hospital Discharge Register                                                                                                                                                                   |
| Rhee et al.,2017         | Self-administered FFQ                                                          | self-reported data on incident physician diagnoses of cardiovascular events; autopsy reports, death certificates, medical records, or information obtained from next of kin or family members |
| Praagman et al.,2016     | Self-administered FFQ                                                          | the Dutch Center for Health Care Information                                                                                                                                                  |
| Zong et al.,2016         | Validated, semi- quantitative 126- item FFQ                                    | Self-reported                                                                                                                                                                                 |
| Dehghan et al.,2017      | Self-administered FFQ                                                          | Death certificates. Residencial registry to confirm residence status                                                                                                                          |

|                                                                        |                                              |                                                                                                                                                                                                                                |
|------------------------------------------------------------------------|----------------------------------------------|--------------------------------------------------------------------------------------------------------------------------------------------------------------------------------------------------------------------------------|
| Okada et al.,2019                                                      | 24-h dietary recalls by trained interviewers | Death certificates, national insurance claims, reports from local physicians, reports from public health nurses and health volunteers, and an annual cardiovascular risk survey were used to ascertain the endpoint of stroke. |
| Mirmiran et al.,2020                                                   | Self-administered FFQ                        | telephone call follow-ups                                                                                                                                                                                                      |
| Sadeghi et al.,2021                                                    | Self-administered FFQ                        | medical records, hospital records, death certificates, and verbal autopsies                                                                                                                                                    |
| <b>carbohydrate Intake with All-Cause and Cause-Specific Mortality</b> |                                              |                                                                                                                                                                                                                                |
| Rohan et al.,1993                                                      | Self-administered FFQ                        | Determine the patient's life status by linking the research files with the files saved by SACCR through computer records                                                                                                       |
| Esrey et al.,1996                                                      | 24-Hour Food Consumption Intake              | The records of participants' mortality were obtained by CDC and NCHS                                                                                                                                                           |
| Palli et al.,2000                                                      | Self-administered FFQ                        | Vital status information was sought for all patients by periodic linkage to Municipal Population Offices and to the Regional Mortality Registry on December 31,1997.                                                           |
| Solfrizzi et al.,2005                                                  | Validated, semi-quantitative 77-item FFQ     | Death certificates. Residencial registry to confirm residence status                                                                                                                                                           |
| Lagiou et al.,2007                                                     | Self-administered FFQ                        | Linkages with the Swedish nationwide health registers, by means of the unique per individual Swedish national registration number, were used for the follow up of the cohort with respect to death and emigration.             |
| Trichopoulou et al. 2007                                               | Self-administered FFQ                        | Death certificates. Residencial registry to confirm residence status                                                                                                                                                           |
| Smit et al.,2007                                                       | 24-Hour Food Consumption Intake              | Death certificates. Residencial registry to confirm residence status                                                                                                                                                           |
| Fung et al.,2010                                                       | Validated, semi- quantitative 126- item FFQ  | Medical record, autopsy report, death certificate, US postal system, state vital statistics departments, National Death Index.                                                                                                 |
| Nilsson et al.,2012                                                    | Self-administered FFQ                        | Mortality end-points were identified by linking the VIP database with the Swedish national cause-of-death registry                                                                                                             |
| Rebello et al.,2014                                                    | Validated, semi- quantitative 165- item FFQ  | The cohort is followed up for mortality through regular record linkage with the population-based Singapore Registry of Births and Deaths.                                                                                      |
| Dehghan et al.,2017                                                    | Self-administered FFQ                        | Death certificates. Residencial registry to confirm residence status                                                                                                                                                           |
| Seidemann et al.,2018                                                  | Validated, semi- quantitative 66- item FFQ   | Number of deaths was determined with annual (or later, semi-annual) telephone calls, linkage to local hospital and state health department records, or for those lost to follow-up, linkage to the National Death Index.       |
| Arthur et al.,2018                                                     | Self-administered FFQ                        | Deaths were captured through the Social Security Death Index, yearly survey updates, notification from family or medical record reviews                                                                                        |
| Shan et al.,2020                                                       | 24-h dietary recalls by trained interviewers | Dietary data and mortality data were linked using different institutional database: WWEIA; NCHS; NDI                                                                                                                           |
| Miyazawa et al.,2020                                                   | Self-administered FFQ                        | Death certificates. Residencial registry to confirm residence status                                                                                                                                                           |
| Mazidi et al.,2020                                                     | 24-h dietary recalls by trained interviewers | Dietary data and mortality data were linked using different institutional database: WWEIA; NCHS; NDI                                                                                                                           |
| Lin et al.,2020                                                        | 24-h dietary recalls by trained interviewers | annual record linkage with the National Death Datasets, by using personal identification number and date of birth provided by the Taiwan Ministry of Health and Welfare                                                        |
| Akter et al.,2021                                                      | Validated, semi-quantitative 147- item FFQ   | We followed up the participants' residency and vital status from the second survey to 31 December 2014 using the residential registry.                                                                                         |

# **carbohydrate Intake with CVD Morbidity**

|                       |                                                                |                                                                                                                                                                                                                                |
|-----------------------|----------------------------------------------------------------|--------------------------------------------------------------------------------------------------------------------------------------------------------------------------------------------------------------------------------|
| Liu et al.,2000       | Validated, semi- quantitative 126- item FFQ                    | Self-reported                                                                                                                                                                                                                  |
| Oh et al.,2005        | Validated, semi- quantitative 126- item FFQ                    | Self-reported                                                                                                                                                                                                                  |
| Wallstrom et al.,2012 | an interview-based, modified diet history method that combined | Self-reported                                                                                                                                                                                                                  |
| Simila et al.,2013    | Self-administered FFQ                                          | identified from the National Hospital Discharge Register and the National Register of Causes of Death                                                                                                                          |
| Yu et al.,2013        | Self-administered FFQ                                          | Self-reported                                                                                                                                                                                                                  |
| Li et al.,2015        | Validated, semi- quantitative 126- item FFQ                    | Medical record, autopsy report, death certificate, US postal system, state vital statistics departments, National Death Index.                                                                                                 |
| Dehghan et al.,2017   | Self-administered FFQ                                          | Death certificates. Residencial registry to confirm residence status                                                                                                                                                           |
| AlEsa et al.,2018     | Validated, semi- quantitative 126- item FFQ                    | Self-reported                                                                                                                                                                                                                  |
| Okada et al.,2019     | 24-h dietary recalls by trained interviewers                   | Death certificates, national insurance claims, reports from local physicians, reports from public health nurses and health volunteers, and an annual cardiovascular risk survey were used to ascertain the endpoint of stroke. |



**Table S7.** Confounding variables of included prospective cohort studies.

| Study                 | cohort                                                      | Dietary Intake | primary confounding variable | Basic factors |     |                | lifestyle factors      |                   |         | socioeconomic status |           |                                          | Disease History               |        |     |                             |                 |
|-----------------------|-------------------------------------------------------------|----------------|------------------------------|---------------|-----|----------------|------------------------|-------------------|---------|----------------------|-----------|------------------------------------------|-------------------------------|--------|-----|-----------------------------|-----------------|
|                       |                                                             |                | Energy intake                | Age           | Sex | Race/ethnicity | BMI / Body Weight / WC | Physical activity | Smoking | Alcohol              | Education | Household income Income-to-poverty ratio | Diabetes/ glucose intolerance | cancer | CVD | hypertension/blood pressure | Medications use |
| McGee et al.,1984     | The Honolulu Heart Program                                  |                | ✓                            | ✓             | ✓   |                | ✓                      | ✓                 | ✓       |                      |           |                                          |                               |        |     |                             | ✓               |
| Posner et al.,1991    | The Framingham Study                                        |                | ✓                            | ✓             | ✓   |                |                        | ✓                 | ✓       | ✓                    |           |                                          | ✓                             |        |     |                             | ✓               |
| Rohan et al.,1993     | SACCR                                                       |                | ✓                            | ✓             | ✓   |                |                        |                   |         |                      |           |                                          |                               |        |     |                             |                 |
| Fehily et al.,1993    | the Caerphilly Study                                        |                |                              | ✓             | ✓   |                | ✓                      |                   | ✓       |                      |           |                                          |                               |        |     |                             |                 |
| Goldbourt et al.,1993 | NA                                                          |                | ✓                            | ✓             | ✓   |                | ✓                      | ✓                 | ✓       |                      |           |                                          |                               |        |     |                             | ✓               |
| Dwyer et al.,1994     | NHANES I                                                    |                |                              | ✓             | ✓   | ✓              | ✓                      |                   |         |                      | ✓         |                                          | ✓                             |        |     |                             |                 |
| Ascherio et al.,1995  | HPFS                                                        | ✓              | ✓                            | ✓             | ✓   |                | ✓                      | ✓                 | ✓       | ✓                    |           |                                          | ✓                             |        |     |                             | ✓               |
| Ascherio et al.,1996  | HPFS                                                        | ✓              | ✓                            | ✓             | ✓   |                | ✓                      | ✓                 | ✓       | ✓                    |           |                                          | ✓                             |        |     |                             | ✓               |
| Esrey et al.,1996     | NA                                                          |                | ✓                            | ✓             | ✓   |                | ✓                      |                   | ✓       |                      |           |                                          | ✓                             |        |     |                             | ✓               |
| Gillman et al.,1997   | United States Framingham Heart Study                        |                | ✓                            | ✓             | ✓   |                |                        |                   |         |                      |           |                                          |                               |        |     |                             |                 |
| Hu et al.,1997        | NHS                                                         | ✓              | ✓                            | ✓             | ✓   |                | ✓                      | ✓                 | ✓       | ✓                    |           |                                          |                               |        |     |                             | ✓               |
| Seino et al.,1997     | The Shibata Study                                           |                |                              | ✓             | ✓   |                |                        |                   |         |                      |           |                                          |                               |        |     |                             | ✓               |
| Pietinen et al.,1997  | The Alpha-Tocopherol, Beta-Carotene Cancer Prevention Study | ✓              | ✓                            | ✓             | ✓   |                | ✓                      | ✓                 | ✓       | ✓                    | ✓         |                                          |                               |        |     |                             | ✓               |
| Mann et al.,1997      | National Health Service Central Register                    |                |                              | ✓             | ✓   |                |                        |                   | ✓       |                      | ✓         | ✓                                        |                               |        |     |                             |                 |
| Payette et al.,1999   | NA                                                          |                |                              | ✓             | ✓   |                | ✓                      |                   |         |                      |           |                                          |                               |        |     |                             |                 |

|                          |                                                                      |   |   |   |   |   |   |   |   |   |   |   |   |   |   |   |   |
|--------------------------|----------------------------------------------------------------------|---|---|---|---|---|---|---|---|---|---|---|---|---|---|---|---|
| Holmes et al.,1999       | NHS                                                                  |   | √ | √ | √ |   |   | √ |   |   |   | √ |   |   |   |   | √ |
| Hu et al.,1999           | NHS                                                                  | √ | √ | √ | √ | √ | √ | √ | √ |   |   |   | √ |   |   |   | √ |
| Hu et al.,1999           | NHS                                                                  | √ | √ | √ | √ | √ | √ | √ | √ |   |   |   | √ |   |   |   | √ |
| Palli et al.,2000        | GC patients                                                          |   |   | √ | √ |   |   |   |   | √ | √ |   | √ |   |   |   |   |
| Liu et al.,2000          | NHS                                                                  | √ | √ | √ | √ | √ | √ | √ | √ |   |   |   |   |   | √ |   | √ |
| Iso et al.,2001          | NHS                                                                  | √ | √ | √ | √ | √ | √ | √ | √ | √ | √ | √ |   |   | √ |   | √ |
| Boniface et al.,2002     | The Health and Lifestyle Survey                                      |   |   | √ | √ |   |   |   |   |   |   |   |   |   |   |   |   |
| Hu et al.,2003           | NHS                                                                  | √ | √ | √ | √ | √ | √ | √ | √ |   |   |   | √ | √ | √ | √ | √ |
| Zhang et al.,2003        | SWHS                                                                 | √ | √ | √ | √ | √ | √ | √ | √ | √ | √ |   |   |   | √ |   |   |
| He et al.,2003           | HPFS                                                                 | √ | √ | √ | √ | √ | √ | √ | √ |   |   |   |   |   | √ |   |   |
| Iso et al.,2003          | NHS                                                                  | √ | √ | √ | √ | √ | √ | √ | √ |   |   |   | √ |   | √ |   |   |
| Sauvaguet et al.,2004    | AHS                                                                  |   |   | √ | √ | √ |   | √ | √ |   |   |   | √ |   | √ |   |   |
| Borugian et al.,2004     | breast cancer patients the Research Centre for Prevention and Health |   |   | √ | √ | √ | √ | √ | √ | √ | √ | √ | √ | √ | √ | √ | √ |
| Jakobsen et al.,2004     |                                                                      | √ | √ | √ | √ | √ | √ | √ | √ |   |   |   | √ |   | √ |   |   |
| Tanasescu et al.,2004    | NHS                                                                  | √ | √ | √ | √ | √ | √ | √ | √ |   |   |   |   |   |   |   |   |
| Kelemen et al.,2005      | IWHS                                                                 | √ |   | √ | √ | √ | √ | √ | √ | √ |   |   | √ |   | √ |   | √ |
| Solfrizzi et al.,2005    | ILSA                                                                 | √ | √ | √ | √ | √ | √ | √ | √ |   |   |   |   |   |   |   |   |
| Leosdottir et al.,2005   | The Malmö Diet and Cancer Study                                      | √ | √ | √ | √ | √ | √ | √ | √ | √ | √ |   |   |   | √ |   |   |
| Tucker et al.,2005       | BLSA                                                                 | √ |   | √ | √ | √ | √ | √ | √ |   |   |   |   |   |   |   |   |
| Oh et al.,2005           | NHS                                                                  | √ | √ | √ | √ | √ | √ | √ | √ |   |   |   | √ |   | √ |   | √ |
| Xu et al.,2006           | the Strong Heart Study                                               | √ | √ | √ | √ |   |   | √ | √ |   |   |   | √ |   | √ |   |   |
| Trichopoulos et al. 2006 |                                                                      |   |   |   |   |   |   |   |   |   |   |   |   |   |   |   |   |
| Smit et al.,2007         | PRHHP                                                                |   | √ | √ | √ | √ | √ | √ |   | √ |   |   |   |   |   |   |   |

|                          |                                                       |   |   |   |   |   |   |   |   |   |   |   |   |  |  |   |   |
|--------------------------|-------------------------------------------------------|---|---|---|---|---|---|---|---|---|---|---|---|--|--|---|---|
| Lagiou et al.,2007       | Scandinavian Women's Lifestyle and Health Cohort      | √ | √ | √ | √ | √ | √ | √ | √ | √ |   |   |   |  |  |   |   |
| Trichopoulou et al. 2007 | Greek-EPIC Cohort                                     | √ | √ | √ | √ | √ | √ | √ | √ | √ |   |   |   |  |  |   | √ |
| Leosdottir et al.,2007   | The Malmö Diet and Cancer Study                       | √ |   | √ | √ | √ | √ | √ | √ | √ | √ |   |   |  |  |   | √ |
| Halbesma et al.,2009     | NA                                                    |   |   | √ | √ | √ | √ | √ | √ |   |   |   |   |  |  |   |   |
| Boden-Albala et al.,2009 | the Northern Manhattan Study                          |   |   | √ | √ | √ | √ | √ | √ | √ |   |   |   |  |  |   |   |
| Bates et al.,2010        | The community-living population of mainland Britain   |   | √ | √ | √ | √ | √ | √ | √ |   | √ |   |   |  |  |   |   |
| Preis et al.,2010        | HFSP                                                  |   | √ | √ | √ | √ | √ | √ | √ |   |   | √ |   |  |  |   | √ |
| Yamagishi et al.,2010    | The Japan Collaborative Cohort Study                  | √ | √ | √ | √ | √ | √ | √ | √ | √ |   | √ |   |  |  |   | √ |
| Fung et al.,2010         | NHS、HPFS                                              |   | √ | √ | √ | √ | √ | √ | √ |   | √ |   |   |  |  | √ | √ |
| Houston et al.,2011      | the Health ABC Study                                  | √ | √ | √ | √ | √ | √ | √ | √ | √ |   | √ |   |  |  | √ | √ |
| Atkinson et al.,2011     | the Caerphilly cohort                                 | √ |   | √ | √ | √ | √ | √ | √ | √ | √ | √ | √ |  |  | √ |   |
| Nilsson et al.,2012      | Västerbotten Intervention Programme                   | √ | √ | √ | √ | √ | √ | √ | √ |   |   |   |   |  |  |   |   |
| Dilis et al.,2012        | The EPIC cohort                                       |   | √ | √ | √ | √ | √ | √ | √ | √ |   |   |   |  |  |   | √ |
| Nagata et al.,2012       | the Takayama Study                                    | √ | √ | √ | √ | √ | √ | √ | √ | √ |   | √ |   |  |  | √ |   |
| Chiuve et al.,2012       | NHS                                                   |   | √ | √ | √ | √ | √ | √ | √ |   | √ | √ | √ |  |  | √ | √ |
| Larsson et al.,2012      | Swedish Mammography Cohort                            | √ | √ | √ | √ | √ | √ | √ | √ | √ |   | √ |   |  |  | √ | √ |
| Wallstrom et al.,2012    | Swedish population-based Malmö Diet and Cancer cohort | √ | √ | √ | √ | √ | √ | √ | √ | √ |   |   |   |  |  |   |   |

|                               |                                                                                 |   |   |   |   |   |   |   |   |   |   |   |   |   |   |
|-------------------------------|---------------------------------------------------------------------------------|---|---|---|---|---|---|---|---|---|---|---|---|---|---|
| Larsson et al.,2012           | Swedish Mammography Cohort                                                      | √ | √ | √ | √ |   | √ | √ | √ | √ | √ |   | √ | √ | √ |
| Yaemsiri et al.,2012          | the WHI-OS                                                                      | √ | √ | √ | √ | √ | √ | √ | √ | √ | √ |   | √ | √ | √ |
| de Oliveira et al.,2012       | United States MESA Cohort                                                       | √ | √ | √ | √ | √ | √ | √ | √ | √ | √ |   |   |   | √ |
| Argos et al.,2013             | HEALS                                                                           |   |   | √ | √ |   | √ | √ | √ | √ | √ |   |   |   |   |
| Yamagishi et al.,2013         | The Japan Public Health Center-based prospective Study                          | √ | √ | √ | √ |   | √ | √ | √ | √ |   |   |   |   |   |
| Simila et al.,2013            | ATBC Study                                                                      | √ | √ | √ | √ |   | √ | √ | √ | √ |   |   |   | √ |   |
| Yu et al.,2013                | China Shanghai study                                                            | √ | √ | √ | √ |   | √ | √ | √ | √ | √ | √ |   | √ |   |
| Levine et al.,2014            | NHANES III                                                                      |   | √ | √ | √ | √ | √ | √ | √ | √ |   |   |   |   |   |
| Wakai et al.,2014             | The Japan Collaborative Cohort Study                                            | √ | √ | √ | √ |   | √ | √ | √ | √ | √ |   |   |   |   |
| Miyagawa et al.,2014          | NIPPON DATA                                                                     | √ | √ | √ | √ |   | √ | √ | √ | √ | √ | √ |   | √ |   |
| Rebello et al.,2014           | Singapore Chinese Health Study                                                  | √ | √ | √ | √ |   | √ | √ | √ | √ | √ |   | √ | √ | √ |
| Haring et al.,2014            | ARIC                                                                            | √ | √ | √ | √ |   | √ | √ | √ | √ | √ | √ |   | √ |   |
| Virtanen et al.,2014          | KIHD                                                                            | √ | √ | √ | √ |   | √ | √ | √ | √ | √ |   | √ | √ |   |
| Santos et al.,2014            | the Diabetes research outpatient clinic at Hospital de Clínicas de Porto Alegre | √ |   | √ | √ |   |   |   | √ |   |   |   | √ |   |   |
| Nagata et al.,2015            | the Takayama Study                                                              | √ | √ | √ | √ |   | √ | √ | √ | √ | √ |   | √ | √ | √ |
| Campmans-Kuijpers et al.,2015 | EPIC                                                                            | √ | √ | √ | √ |   | √ | √ | √ | √ | √ |   | √ |   |   |
| Puaschitz et al.,2015         | WENBIT                                                                          | √ |   | √ | √ |   |   |   | √ |   |   |   | √ | √ | √ |

|                              |                                                                                     |   |   |   |   |   |   |   |   |   |   |   |   |   |   |
|------------------------------|-------------------------------------------------------------------------------------|---|---|---|---|---|---|---|---|---|---|---|---|---|---|
| Chiuve et al.,2015           | WHS                                                                                 |   | √ | √ | √ |   | √ | √ | √ | √ | √ |   | √ |   | √ |
| Li et al.,2015               | NHS HPFS                                                                            | √ | √ | √ | √ |   | √ | √ | √ | √ |   |   | √ |   | √ |
| Guasch-Ferré et al.,2015     | the PREDIMED study                                                                  | √ | √ | √ | √ |   | √ | √ | √ | √ | √ | √ | √ | √ | √ |
| Courand et al.,2016          | The OLD-HTA Lyon cohort                                                             |   |   | √ | √ |   | √ |   | √ |   |   |   | √ |   | √ |
| Hernández-Alonso et al.,2016 | PREDIMED                                                                            |   | √ | √ | √ |   | √ | √ | √ | √ |   |   | √ |   | √ |
| Song et al.,2016             | NHS / HPFS                                                                          | √ | √ | √ | √ |   | √ | √ | √ | √ |   |   |   | √ |   |
| Owen et al.,2016             | The Australian Diabetes, Obesity and Lifestyle Study (AusDiab)                      |   | √ | √ | √ |   | √ | √ | √ | √ | √ |   | √ | √ |   |
| Wang et al.,2016             | NHS HPFS                                                                            | √ | √ | √ | √ | √ | √ | √ | √ | √ |   |   | √ | √ | √ |
| Xu et al.,2016               | ULSAM                                                                               | √ | √ | √ | √ |   | √ | √ | √ | √ |   |   | √ |   | √ |
| Chen et al.,2016             | the HPFS、NHS、NHSII                                                                  | √ | √ | √ | √ |   | √ |   |   |   |   |   | √ |   | √ |
| Praagman et al.,2016         | the European Prospective Investigation into Cancer and Nutrition-Netherlands cohort |   | √ | √ | √ |   | √ | √ | √ | √ | √ |   |   |   |   |
| Zong et al.,2016             | the HPFS、NHS                                                                        | √ | √ | √ | √ |   | √ | √ | √ | √ |   |   |   | √ | √ |
| Holmes et al.,2017           | NHS                                                                                 |   |   | √ | √ |   | √ |   |   | √ |   |   |   |   | √ |
| Zaslavsky et al.,2017        | WHI                                                                                 | √ | √ | √ | √ | √ | √ | √ | √ | √ | √ | √ |   |   |   |
| Dehghan et al.,2017          | PURE                                                                                |   | √ | √ | √ |   | √ | √ | √ | √ |   |   | √ |   |   |
| Rhee et al.,2017             | WHS                                                                                 | √ | √ | √ | √ |   | √ | √ | √ | √ |   |   | √ |   | √ |
| Arthur et al.,2018           | UM HN-SPORE                                                                         | √ | √ | √ | √ |   | √ | √ | √ |   |   |   | √ |   |   |
| Tharrey et al.,2018          | AHS-2                                                                               |   | √ | √ | √ | √ | √ | √ | √ | √ | √ | √ |   |   |   |
| Song et al.,2018             | NHS / HPFS                                                                          | √ | √ | √ | √ |   | √ | √ | √ | √ |   |   |   |   | √ |
| Ricci et al.,2018            | NHANES                                                                              | √ |   | √ | √ | √ | √ | √ | √ | √ | √ |   |   | √ |   |

|                          |                                                              |   |   |   |   |   |   |   |   |   |   |   |   |   |   |   |
|--------------------------|--------------------------------------------------------------|---|---|---|---|---|---|---|---|---|---|---|---|---|---|---|
| Seidelmann et al.,2018   | ARIC                                                         | √ | √ | √ | √ |   | √ | √ | √ | √ | √ | √ |   |   |   |   |
| AlEssa et al.,2018       | NHS、HPFS                                                     | √ | √ | √ | √ |   | √ | √ | √ | √ |   |   |   |   |   | √ |
| Mazidi et al.,2019       | NHANES 1999-2010                                             |   |   |   |   |   |   |   |   |   |   |   |   |   |   |   |
| Papanikolaou et al.,2019 | NHANES III                                                   |   |   |   |   |   |   |   |   |   |   |   |   |   |   |   |
| Kurihara et al.,2019     | NIPPONDAT A90                                                | √ | √ | √ | √ |   | √ | √ | √ | √ |   |   |   |   |   |   |
| Virtanen et al.,2019     | KIHD                                                         | √ | √ | √ | √ |   | √ | √ | √ | √ | √ | √ | √ | √ | √ | √ |
| Budhathoki et al.,2019   | JPHC                                                         | √ | √ | √ | √ |   | √ | √ | √ | √ | √ | √ |   |   |   |   |
| Chan et al.,2019         | NA                                                           | √ | √ | √ | √ |   | √ | √ | √ | √ | √ |   | √ | √ | √ | √ |
| Jiao et al.,2019         | NHS HPFS                                                     | √ | √ | √ | √ |   | √ | √ | √ | √ | √ |   | √ | √ |   | √ |
| Zhuang et al.,2019 b     | CHNS                                                         | √ | √ | √ | √ |   | √ | √ | √ | √ | √ | √ |   |   |   |   |
| Zhuang et al.,2019 a     | the National Institutes of Health-AARP Diet and Health Study | √ |   | √ | √ | √ | √ | √ | √ | √ | √ | √ | √ | √ | √ | √ |
| Zhuang et al.,2019 c     | CHNS、NHANES                                                  | √ | √ | √ | √ |   | √ | √ | √ | √ | √ | √ |   |   |   |   |
| Okada et al.,2019        | CIRCS                                                        | √ | √ | √ | √ |   | √ | √ | √ | √ | √ |   | √ |   |   | √ |
| Mendonça et al.,2020     | The Newcastle 85+ Study                                      |   | √ | √ | √ |   |   | √ |   |   | √ |   | √ | √ | √ | √ |
| Ho et al.,2020           | UK Biobank                                                   |   | √ | √ | √ |   | √ | √ | √ | √ | √ | √ | √ |   |   |   |
| Langsetmo et al.,2020    | MrOS                                                         |   | √ | √ | √ | √ | √ | √ | √ | √ | √ |   | √ | √ | √ | √ |
| Chen et al.,2020         | The Rotterdam Study                                          | √ | √ | √ | √ |   | √ | √ | √ | √ | √ | √ |   |   |   |   |
| Huang et al.,2020        | NIH-AARP Diet and Health Study                               | √ | √ | √ | √ | √ | √ | √ | √ | √ | √ | √ | √ |   |   |   |
| Trevisan et al.,2020     | The Alpines Project                                          |   | √ | √ | √ |   |   | √ |   |   | √ |   |   |   |   | √ |
| Mao et al.,2020          | CHNS                                                         | √ | √ | √ | √ |   | √ | √ | √ | √ | √ | √ | √ |   |   | √ |
| Lelli et al.,2020        | the longitudinal InCHIANTI study                             |   | √ | √ | √ |   | √ | √ | √ | √ |   |   | √ |   |   | √ |
| Ho et al.,2020           | UK Biobank                                                   |   | √ | √ | √ |   | √ | √ | √ | √ | √ | √ | √ |   |   |   |

|                      |                                                |   |   |   |   |   |   |   |   |   |   |   |   |   |   |   |
|----------------------|------------------------------------------------|---|---|---|---|---|---|---|---|---|---|---|---|---|---|---|
| Mazidi et al.,2020   | NHANES 1999-2010                               | √ | √ | √ | √ |   | √ | √ | √ | √ | √ |   | √ |   |   | √ |
| Shan et al.,2020     | NHANES(1999-2014)                              |   | √ | √ | √ | √ | √ | √ | √ | √ | √ | √ | √ | √ |   | √ |
| Miyazawa et al.,2020 | NIPPON DATA                                    | √ | √ | √ | √ |   | √ | √ | √ | √ |   |   | √ |   |   | √ |
| Lin et al.,2020      | CMUH                                           |   | √ | √ | √ |   | √ | √ | √ | √ | √ | √ | √ |   |   |   |
| Mirmiran et al.,2020 | the Tehran Lipid and Glucose Prospective Study | √ | √ | √ | √ |   | √ | √ | √ | √ |   |   | √ |   | √ | √ |
| Kwon et al.,2021     | KoGES                                          |   | √ | √ | √ |   | √ | √ | √ | √ | √ |   | √ |   | √ |   |
| Yao et al.,2021      | PLCO                                           | √ | √ | √ | √ | √ | √ | √ | √ | √ | √ |   | √ |   | √ | √ |
| Akter et al.,2021    | JPHC study                                     | √ | √ | √ | √ |   | √ | √ | √ | √ |   | √ | √ |   | √ |   |
| Sadeghi et al.,2021  | ICS                                            | √ | √ | √ | √ | √ | √ | √ | √ | √ |   |   | √ |   | √ | √ |
| Sun et al.,2021      | WHI                                            | √ | √ | √ | √ |   | √ | √ | √ | √ | √ |   | √ | √ | √ | √ |

Abbreviations: BPRHS = Boston Puerto Rican Health Study, BMI = body mass index, FICSIT = Frailty and

Injuries: Cooperative Studies of Intervention Techniques, NHANES = National Health and Nutrition Examination Survey, TLGS = Tehran Lipid and Glucose Study, VF = vegetable/fruit, WC = waist circumference.

Abbreviations: ADDITION = Anglo-Danish-Dutch Study of Intensive Treatment In People with Screen-Detected

Diabetes in Primary Care-Cambridge study, BMI = body mass index, HPFS = Health Professionals Follow-up

Study, JPHC = Japan public health center study, MORGEN = The Monitoring Project on Risk Factors and Chronic Diseases in the Netherlands Study,

NHANES = National Health and Nutrition Examination Survey, NHS = Nurses Health Study, PREDIMED-Plus = PREvención con DIeta MEDiterránea (Prevention with Mediterranean Diet)-Plus, VF = vegetable/fruit

**Table S8.** Newcastle-Ottawa Scale (NOS) scores of included prospective cohort studies

| Reference<br>(Last name<br>et al., Year) | Selection (max 4) <sup>a</sup>                 |                                                  |                              |                                                                                      | Outcome (max 3) <sup>b</sup> |                                                                    |                                           | Comparability<br>(max 2) <sup>c</sup> |                                                                       | Total <sup>d</sup> |
|------------------------------------------|------------------------------------------------|--------------------------------------------------|------------------------------|--------------------------------------------------------------------------------------|------------------------------|--------------------------------------------------------------------|-------------------------------------------|---------------------------------------|-----------------------------------------------------------------------|--------------------|
|                                          | Representativeness<br>of the exposed<br>cohort | Selection<br>of the<br>non-<br>exposed<br>cohort | Ascertainment<br>of exposure | Demonstration<br>that outcome<br>of interest was<br>not present at<br>start of study | Assessment<br>of outcome     | Was<br>follow-<br>up long<br>enough<br>for<br>outcomes<br>to occur | Adequacy<br>of follow-<br>up of<br>cohort | Study<br>controls<br>for<br>energy    | Study<br>controls<br>for pre-<br>specified<br>secondary<br>covariates |                    |
| McGee et al.,1984                        | 1                                              | 1                                                | 1                            | 1                                                                                    | 1                            | 1                                                                  | 0                                         | 1                                     | 1                                                                     | 8                  |
| Posner et al.,1991                       | 1                                              | 1                                                | 1                            | 1                                                                                    | 1                            | 1                                                                  | 0                                         | 1                                     | 1                                                                     | 8                  |
| Rohan et al.,1993                        | 0                                              | 1                                                | 1                            | 1                                                                                    | 1                            | 1                                                                  | 0                                         | 1                                     | 0                                                                     | 7                  |
| Fehily et al.,1993                       | 1                                              | 1                                                | 1                            | 1                                                                                    | 1                            | 1                                                                  | 0                                         | 0                                     | 1                                                                     | 7                  |
| Goldbourt et al.,1993                    | 0                                              | 1                                                | 1                            | 1                                                                                    | 1                            | 1                                                                  | 0                                         | 0                                     | 1                                                                     | 6                  |
| Dwyer et al.,1994                        | 1                                              | 1                                                | 1                            | 1                                                                                    | 1                            | 1                                                                  | 1                                         | 1                                     | 1                                                                     | 9                  |
| Ascherio et al.,1995                     | 0                                              | 1                                                | 1                            | 1                                                                                    | 1                            | 1                                                                  | 1                                         | 1                                     | 1                                                                     | 8                  |
| Ascherio et al.,1996                     | 0                                              | 1                                                | 1                            | 1                                                                                    | 1                            | 1                                                                  | 1                                         | 1                                     | 1                                                                     | 8                  |
| Esrey et al.,1996                        | 0                                              | 0                                                | 1                            | 1                                                                                    | 1                            | 1                                                                  | 1                                         | 1                                     | 1                                                                     | 7                  |
| Gillman et al.,1997                      | 1                                              | 1                                                | 1                            | 1                                                                                    | 1                            | 1                                                                  | 1                                         | 0                                     | 1                                                                     | 8                  |
| Hu et al.,1997                           | 0                                              | 1                                                | 1                            | 1                                                                                    | 1                            | 1                                                                  | 1                                         | 1                                     | 1                                                                     | 8                  |
| Seino et al.,1997                        | 1                                              | 1                                                | 1                            | 1                                                                                    | 1                            | 1                                                                  | 0                                         | 0                                     | 1                                                                     | 7                  |
| Pietinen et al.,1997                     | 0                                              | 1                                                | 1                            | 1                                                                                    | 1                            | 1                                                                  | 0                                         | 1                                     | 1                                                                     | 7                  |



|                       |   |   |   |   |   |   |   |   |   |   |
|-----------------------|---|---|---|---|---|---|---|---|---|---|
| Mann et al.,1997      | 1 | 1 | 1 | 1 | 1 | 1 | 1 | 0 | 1 | 8 |
| Payette et al.,1999   | 0 | 1 | 1 | 1 | 1 | 1 | 0 | 0 | 1 | 6 |
| Holmes et al.,1999    | 0 | 1 | 1 | 1 | 1 | 1 | 1 | 1 | 1 | 8 |
| Hu et al.,1999        | 0 | 1 | 1 | 1 | 1 | 1 | 1 | 1 | 1 | 8 |
| Hu et al.,1999        | 0 | 1 | 1 | 1 | 1 | 1 | 1 | 1 | 1 | 8 |
| Palli et al.,2000     | 0 | 1 | 1 | 1 | 1 | 1 | 1 | 0 | 1 | 7 |
| Liu et al.,2000       | 0 | 1 | 1 | 1 | 1 | 1 | 1 | 1 | 1 | 8 |
| Iso et al.,2001       | 0 | 1 | 1 | 1 | 1 | 1 | 1 | 1 | 1 | 8 |
| Boniface et al.,2002  | 1 | 1 | 1 | 1 | 1 | 1 | 0 | 0 | 0 | 6 |
| Hu et al.,2003        | 0 | 1 | 1 | 1 | 1 | 1 | 1 | 1 | 1 | 8 |
| Zhang et al.,2003     | 0 | 1 | 1 | 1 | 1 | 1 | 0 | 1 | 1 | 7 |
| He et al.,2003        | 0 | 1 | 1 | 1 | 1 | 1 | 1 | 1 | 1 | 8 |
| Iso et al.,2003       | 0 | 1 | 1 | 1 | 1 | 1 | 1 | 1 | 1 | 8 |
| Sauvaget et al.,2004  | 1 | 1 | 1 | 1 | 1 | 1 | 0 | 0 | 1 | 7 |
| Borugian et al.,2004  | 0 | 1 | 1 | 1 | 1 | 1 | 0 | 0 | 1 | 6 |
| Jakobsen et al.,2004  | 1 | 1 | 1 | 1 | 1 | 1 | 0 | 1 | 1 | 8 |
| Tanasescu et al.,2004 | 0 | 1 | 1 | 1 | 1 | 1 | 1 | 1 | 1 | 8 |
| Kelemen et al.,2005   | 0 | 1 | 1 | 1 | 1 | 1 | 0 | 1 | 1 | 7 |
| Solfrizzi et al.,2005 | 1 | 1 | 1 | 1 | 1 | 1 | 1 | 1 | 1 | 9 |

|                          |   |   |   |   |   |   |   |   |   |   |
|--------------------------|---|---|---|---|---|---|---|---|---|---|
| Leosdottir et al.,2005   | 1 | 1 | 1 | 1 | 1 | 1 | 1 | 1 | 1 | 9 |
| Tucker et al.,2005       | 1 | 1 | 1 | 1 | 1 | 1 | 0 | 1 | 1 | 8 |
| Oh et al.,2005           | 0 | 1 | 1 | 1 | 1 | 1 | 1 | 1 | 1 | 8 |
| Xu et al.,2006           | 1 | 1 | 1 | 1 | 1 | 1 | 0 | 1 | 1 | 8 |
| Trichopoulou et al. 2006 | 1 | 1 | 1 | 1 | 1 | 1 | 1 | 1 | 1 | 9 |
| Smit et al.,2007         | 1 | 1 | 1 | 1 | 1 | 1 | 0 | 1 | 1 | 8 |
| Lagiou et al.,2007       | 0 | 1 | 1 | 1 | 1 | 1 | 1 | 1 | 1 | 8 |
| Trichopoulou et al. 2007 | 1 | 1 | 1 | 1 | 1 | 1 | 1 | 1 | 1 | 9 |
| Leosdottir et al.,2007   | 0 | 1 | 1 | 1 | 1 | 1 | 0 | 0 | 1 | 6 |
| Halbesma et al.,2009     | 0 | 1 | 1 | 1 | 1 | 1 | 0 | 0 | 1 | 6 |
| Boden-Albala et al.,2009 | 1 | 1 | 1 | 1 | 1 | 1 | 0 | 0 | 1 | 7 |
| Bates et al.,2010        | 1 | 1 | 1 | 1 | 1 | 1 | 1 | 1 | 1 | 9 |
| Preis et al.,2010        | 0 | 1 | 1 | 1 | 1 | 1 | 1 | 1 | 1 | 8 |
| Yamagishi et al.,2010    | 1 | 1 | 1 | 1 | 1 | 1 | 1 | 1 | 1 | 9 |
| Fung et al.,2010         | 0 | 1 | 1 | 1 | 1 | 1 | 1 | 1 | 1 | 8 |
| Houston et al.,2011      | 1 | 1 | 1 | 1 | 1 | 1 | 0 | 1 | 1 | 8 |
| Atkinson et al.,2011     | 1 | 1 | 1 | 1 | 1 | 1 | 0 | 0 | 1 | 7 |
| Nilsson et al.,2012      | 1 | 1 | 1 | 1 | 1 | 1 | 0 | 1 | 1 | 8 |
| Dilis et al.,2012        | 1 | 1 | 1 | 1 | 1 | 1 | 0 | 1 | 1 | 8 |

|                         |   |   |   |   |   |   |   |   |   |   |
|-------------------------|---|---|---|---|---|---|---|---|---|---|
| Nagata et al.,2012      | 1 | 1 | 1 | 1 | 1 | 1 | 0 | 1 | 1 | 8 |
| Chiueve et al.,2012     | 0 | 1 | 1 | 1 | 1 | 1 | 1 | 1 | 1 | 8 |
| Nilsson et al.,2012     | 1 | 1 | 1 | 1 | 1 | 1 | 0 | 1 | 1 | 8 |
| Wallstrom et al.,2012   | 1 | 1 | 1 | 1 | 1 | 1 | 0 | 1 | 1 | 8 |
| Larsson et al.,2012     | 1 | 1 | 1 | 1 | 1 | 1 | 0 | 1 | 1 | 8 |
| Yaemsiri et al.,2012    | 0 | 1 | 1 | 1 | 1 | 1 | 0 | 1 | 1 | 7 |
| de Oliveira et al.,2012 | 1 | 1 | 1 | 1 | 1 | 1 | 0 | 1 | 1 | 8 |
| Argos et al.,2013       | 1 | 1 | 1 | 1 | 1 | 1 | 0 | 0 | 1 | 7 |
| Yamagishi et al.,2013   | 1 | 1 | 1 | 1 | 1 | 1 | 0 | 1 | 1 | 8 |
| Simila et al.,2013      | 0 | 1 | 1 | 1 | 1 | 1 | 0 | 1 | 1 | 7 |
| Yu et al.,2013          | 1 | 1 | 1 | 1 | 1 | 1 | 0 | 1 | 1 | 8 |
| Levine et al.,2014      | 1 | 1 | 1 | 1 | 1 | 1 | 0 | 1 | 1 | 8 |
| Wakai et al.,2014       | 1 | 1 | 1 | 1 | 1 | 1 | 0 | 1 | 1 | 8 |
| Miyagawa et al.,2014    | 1 | 1 | 1 | 1 | 1 | 1 | 0 | 1 | 1 | 8 |
| Rebello et al.,2014     | 1 | 1 | 1 | 1 | 1 | 1 | 0 | 1 | 1 | 8 |
| Haring et al.,2014      | 0 | 1 | 1 | 1 | 1 | 1 | 0 | 1 | 1 | 7 |
| Virtanen et al.,2014    | 0 | 1 | 1 | 1 | 1 | 1 | 0 | 1 | 1 | 7 |
| Santos et al.,2014      | 0 | 1 | 1 | 1 | 1 | 1 | 0 | 0 | 1 | 6 |
| Nagata et al.,2015      | 1 | 1 | 1 | 1 | 1 | 1 | 0 | 1 | 1 | 8 |

|                               |   |   |   |   |   |   |   |   |   |   |
|-------------------------------|---|---|---|---|---|---|---|---|---|---|
| Campmans-Kuijpers et al.,2015 | 0 | 1 | 1 | 1 | 1 | 1 | 0 | 1 | 1 | 7 |
| Puaschitz et al.,2015         | 0 | 1 | 1 | 1 | 1 | 1 | 1 | 0 | 1 | 7 |
| Chiuve et al.,2015            | 0 | 1 | 1 | 1 | 1 | 1 | 1 | 1 | 1 | 8 |
| Li et al.,2015                | 0 | 1 | 1 | 1 | 1 | 1 | 1 | 1 | 1 | 8 |
| Guasch-Ferré et al.,2015      | 1 | 1 | 1 | 1 | 1 | 1 | 1 | 1 | 1 | 9 |
| Courand et al.,2016           | 0 | 1 | 1 | 1 | 1 | 1 | 0 | 0 | 1 | 6 |
| Hernández-Alonso et al.,2016  | 1 | 1 | 1 | 1 | 1 | 1 | 0 | 1 | 1 | 8 |
| Song et al.,2016              | 0 | 1 | 1 | 1 | 1 | 1 | 1 | 1 | 1 | 8 |
| Owen et al.,2016              | 1 | 1 | 1 | 1 | 1 | 1 | 0 | 1 | 1 | 8 |
| Wang et al.,2016              | 0 | 1 | 1 | 1 | 1 | 1 | 1 | 1 | 1 | 8 |
| Xu et al.,2016                | 0 | 1 | 1 | 1 | 1 | 1 | 0 | 1 | 1 | 7 |
| Chen et al.,2016              | 0 | 1 | 1 | 1 | 1 | 1 | 1 | 1 | 1 | 8 |
| Praagman et al.,2016          | 0 | 1 | 1 | 1 | 1 | 1 | 0 | 1 | 1 | 7 |
| Zong et al.,2016              | 0 | 1 | 1 | 1 | 1 | 1 | 1 | 1 | 1 | 8 |
| Holmes et al.,2017            | 0 | 1 | 1 | 1 | 1 | 1 | 1 | 0 | 1 | 7 |
| Zaslavsky et al.,2017         | 0 | 1 | 1 | 1 | 1 | 1 | 0 | 1 | 1 | 7 |
| Dehghan et al.,2017           | 1 | 1 | 1 | 1 | 1 | 1 | 0 | 1 | 1 | 8 |
| Rhee et al.,2017              | 0 | 1 | 1 | 1 | 1 | 1 | 0 | 1 | 1 | 7 |

|                          |   |   |   |   |   |   |   |   |   |   |
|--------------------------|---|---|---|---|---|---|---|---|---|---|
| Arthur et al.,2018       | 0 | 1 | 1 | 1 | 1 | 1 | 0 | 1 | 1 | 7 |
| Tharrey et al.,2018      | 1 | 1 | 1 | 1 | 1 | 1 | 0 | 1 | 1 | 8 |
| Song et al.,2018         | 0 | 1 | 1 | 1 | 1 | 1 | 1 | 1 | 1 | 8 |
| Ricci et al.,2018        | 1 | 1 | 1 | 1 | 1 | 1 | 1 | 0 | 1 | 8 |
| Seidelmann et al.,2018   | 1 | 1 | 1 | 1 | 1 | 1 | 0 | 1 | 1 | 8 |
| AlEsa et al.,2018        | 0 | 1 | 1 | 1 | 1 | 1 | 1 | 1 | 1 | 8 |
| Mazidi et al.,2019       | 0 | 1 | 1 | 1 | 1 | 1 | 0 | 1 | 1 | 7 |
| Papanikolaou et al.,2019 | 0 | 1 | 1 | 1 | 1 | 1 | 0 | 1 | 1 | 7 |
| Kurihara et al.,2019     | 1 | 1 | 1 | 1 | 1 | 1 | 0 | 1 | 1 | 8 |
| Virtanen et al.,2019     | 0 | 1 | 1 | 1 | 1 | 1 | 0 | 1 | 1 | 7 |
| Budhathoki et al.,2019   | 1 | 1 | 1 | 1 | 1 | 1 | 0 | 1 | 1 | 8 |
| Chan et al.,2019         | 0 | 1 | 1 | 1 | 1 | 1 | 0 | 1 | 1 | 7 |
| Jiao et al.,2019         | 0 | 1 | 1 | 1 | 1 | 1 | 1 | 1 | 1 | 8 |
| Zhuang et al.,2019       | 1 | 1 | 1 | 1 | 1 | 1 | 0 | 1 | 1 | 8 |
| Zhuang et al.,2019       | 1 | 1 | 1 | 1 | 1 | 1 | 0 | 0 | 1 | 7 |
| Zhuang et al.,2019       | 1 | 1 | 1 | 1 | 1 | 1 | 0 | 1 | 1 | 8 |
| Okada et al.,2019        | 0 | 1 | 1 | 1 | 1 | 1 | 0 | 1 | 1 | 7 |
| Mendonça et al.,2020     | 0 | 1 | 1 | 1 | 1 | 1 | 0 | 1 | 1 | 7 |
| Ho et al.,2020           | 1 | 1 | 1 | 1 | 1 | 1 | 1 | 1 | 1 | 9 |

|                       |   |   |   |   |   |   |   |   |   |   |
|-----------------------|---|---|---|---|---|---|---|---|---|---|
| Langsetmo et al.,2020 | 0 | 1 | 1 | 1 | 1 | 1 | 0 | 1 | 1 | 7 |
| Chen et al.,2020      | 0 | 1 | 1 | 1 | 1 | 1 | 0 | 1 | 1 | 7 |
| Huang et al.,2020     | 1 | 1 | 1 | 1 | 1 | 1 | 0 | 1 | 1 | 8 |
| Trevisan et al.,2020  | 0 | 1 | 1 | 1 | 1 | 1 | 0 | 0 | 1 | 6 |
| Mao et al.,2020       | 1 | 1 | 1 | 1 | 1 | 1 | 0 | 1 | 1 | 8 |
| Lelli et al.,2020     | 0 | 1 | 1 | 1 | 1 | 1 | 0 | 1 | 1 | 7 |
| Ho et al.,2020        | 1 | 1 | 1 | 1 | 1 | 1 | 1 | 1 | 1 | 9 |
| Mazidi et al.,2020    | 1 | 1 | 1 | 1 | 1 | 1 | 1 | 0 | 1 | 8 |
| Shan et al.,2020      | 1 | 1 | 1 | 1 | 1 | 1 | 1 | 0 | 1 | 8 |
| Miyazawa et al.,2020  | 1 | 1 | 1 | 1 | 1 | 1 | 0 | 1 | 1 | 8 |
| Lin et al.,2020       | 0 | 1 | 1 | 1 | 1 | 1 | 0 | 0 | 1 | 6 |
| Mirmiran et al.,2020  | 1 | 1 | 1 | 1 | 1 | 1 | 0 | 1 | 1 | 8 |
| Kwon et al.,2021      | 1 | 1 | 1 | 1 | 1 | 1 | 0 | 1 | 1 | 8 |
| Yao et al.,2021       | 0 | 1 | 1 | 1 | 1 | 1 | 0 | 1 | 1 | 7 |
| Akter et al.,2021     | 1 | 1 | 1 | 1 | 1 | 1 | 0 | 1 | 1 | 8 |
| Sadeghi et al.,2021   | 1 | 1 | 1 | 1 | 1 | 1 | 0 | 1 | 1 | 8 |
| Sun et al.,2021       | 0 | 1 | 1 | 1 | 1 | 1 | 0 | 1 | 1 | 7 |

<sup>a</sup>Maximum 4 points awarded for cohort representativeness, selection of non-exposed cohort, exposure assessment, and demonstration that the outcome is not present at baseline

<sup>b</sup>Maximum 3 points awarded for follow-up length, adequacy of follow-up, and outcome assessment

<sup>c</sup>Maximum 2 points awarded for controlling for the pre-specified primary confounding variable (energy intake) and 3 of the 5 secondary (age,sex,physical activity, smoking status, baseline BMI or body weight) confounding variables

<sup>d</sup>A maximum of 9 points could be awarded. Cohorts with NOS  $\geq 6$  are considered high quality.  
Abbreviations: BMI = body mass index; NOS = Newcastle-Ottawa Scale.

**Table S9.** gender subgroup-analysis of dietary macronutrient intake and on mortality or CVD events

| Exposure       | Endpoint             | Stratum       | Number of cohorts | Pooled RR(95%CI)            | Text of heterogeneity |         |
|----------------|----------------------|---------------|-------------------|-----------------------------|-----------------------|---------|
|                |                      |               |                   |                             | I <sup>2</sup> (%)    | p value |
| Total protein  | Total mortality      | all female    | 5                 | 0.819(0.661, 1.015)         | 73.5%                 | 0.004   |
|                |                      | female/male≥1 | 12                | 0.994(0.909, 1.086)         | 77.2%                 | 0.000   |
|                |                      | female/male<1 | 3                 | 0.908(0.669, 1.232)         | 0.0%                  | 0.462   |
|                |                      | all male      | 5                 | 1.005(0.879,1.148)          | 56.1%                 | 0.058   |
| Total protein  | Cancer mortality     | all female    | 6                 | 0.890(0.741, 1.067)         | 58.6%                 | 0.084   |
|                |                      | female/male≥1 | 7                 | 1.042(0.867, 1.251)         | 67.3%                 | 0.005   |
|                |                      | female/male<1 | 1                 | 1.000(0.754,1.327)          | .                     | .       |
|                |                      | all male      | 3                 | 0.777(0.544, 1.110)         | 78.6%                 | 0.009   |
| Total protein  | CVD events mortality | all female    | 4                 | 0.979(0.927, 1.034)         | 0.0%                  | 0.903   |
|                |                      | female/male≥1 | 8                 | 0.914(0.745,1.121)          | 59.6%                 | 0.015   |
|                |                      | all male      | 5                 | 0.990(0.961, 1.020)         | 0.0%                  | 0.888   |
|                |                      |               |                   |                             |                       |         |
| Animal protein | Total mortality      | all female    | 3                 | 0.984(0.939, 1.030)         | 0.3%                  | 0.367   |
|                |                      | female/male≥1 | 4                 | 1.112(0.979, 1.265)         | 81.4%                 | 0.001   |
|                |                      | all male      | 3                 | 1.046(0.783,1.398)          | 69.0%                 | 0.040   |
|                |                      |               |                   |                             |                       |         |
| Animal protein | Cancer mortality     | all female    | 4                 | 0.960(0.887,1.040)          | 1.7%                  | 0.384   |
|                |                      | female/male≥1 | 4                 | 1.015(0.921, 1.119)         | 25.2%                 | 0.260   |
|                |                      | female/male<1 | 1                 | 1.090(0.828, 1.436)         | .                     | .       |
|                |                      | all male      | 1                 | 0.700(0.439,1.117)          | .                     | .       |
| Animal protein | CVD events mortality | all female    | 4                 | 1.053(0.965,1.149)          | 0.0%                  | 0.812   |
|                |                      | female/male≥1 | 5                 | 1.094(0.866, 1.381)         | 75.3%                 | 0.003   |
|                |                      | all male      | 3                 | 1.039(0.874,1.235)          | 0.0%                  | 0.501   |
|                |                      |               |                   |                             |                       |         |
| Plant protein  | Total mortality      | all female    | 3                 | 0.896(0.801,1.003)          | 46.3%                 | 0.155   |
|                |                      | female/male≥1 | 4                 | 0.947(0.848, 1.058)         | 66.9%                 | 0.029   |
|                |                      | all male      | 3                 | 0.953(0.772,1.177)          | 28.3%                 | 0.248   |
|                |                      |               |                   |                             |                       |         |
| Plant protein  | Cancer mortality     | all female    | 4                 | 0.969(0.809, 1.160)         | 51.8%                 | 0.101   |
|                |                      | female/male≥1 | 4                 | 0.956(0.875,1.044)          | 0.0%                  | 0.430   |
|                |                      | female/male<1 | 1                 | 0.820(0.618,1.087)          | .                     | .       |
|                |                      | all male      | 1                 | 0.977(0.897, 1.064)         | .                     | .       |
| Plant protein  | CVD events mortality | all female    | 4                 | <b>0.859 (0.781,0.945)</b>  | 0.0%                  | 0.602   |
|                |                      | female/male≥1 | 6                 | 0.877 (0.748, 1.028)        | 29.1%                 | 0.177   |
|                |                      | all male      | 3                 | 0.846 (0.584, 1.227)        | 40.8%                 | 0.133   |
|                |                      |               |                   |                             |                       |         |
| Total protein  | CVD events           | all female    | 6                 | <b>0.816 (0.715, 0.930)</b> | 37.4%                 | 0.157   |
|                |                      | female/male≥1 | 4                 | 0.941 (0.860, 1.029)        | 0.0%                  | 0.625   |
|                |                      | female/male<1 | 1                 | 1.120 (0.350, 3.620)        | .                     | .       |
|                |                      | all male      | 4                 | 0.902 (0.780, 1.043)        | 9.3%                  | 0.347   |
| Total fat      | CVD events mortality | all female    | 6                 | 1.025 (0.859, 1.225)        | 61.5%                 | 0.023   |
|                |                      | female/male≥1 | 10                | 0.959 (0.876, 1.049)        | 73.7%                 | 0.000   |
|                |                      | all male      | 5                 | 0.941 (0.788, 1.124)        | 74.3%                 | 0.004   |
| Total fat      | Total mortality      | all female    | 3                 | 1.008 (0.752, 1.351)        | 89.0%                 | 0.000   |
|                |                      | female/male≥1 | 8                 | <b>0.918 (0.827, 0.986)</b> | 81.9%                 | 0.000   |
|                |                      | female/male<1 | 1                 | 0.670 (0.377, 1.191)        | .                     | .       |
|                |                      | all male      | 4                 | <b>0.883 (0.783, 0.995)</b> | 46.6%                 | 0.131   |
| SFA            | Total mortality      | all female    | 4                 | 1.124 (0.962, 1.313)        | 51.1%                 | 0.105   |
|                |                      | female/male≥1 | 10                | 1.074 (0.944, 1.222)        | 97.0%                 | 0.000   |
|                |                      | female/male<1 | 2                 | 1.016 (0.708, 1.457)        | 0.0%                  | 0.979   |



|           |                      |                      |    |                             |       |       |
|-----------|----------------------|----------------------|----|-----------------------------|-------|-------|
| SFA       | CVD events mortality | all male             | 6  | 1.015 (0.952, 1.081)        | 37.1% | 0.159 |
|           |                      | all female           | 6  | 1.227 (1.073, 1.403)        | 14.7% | 0.320 |
|           |                      | female/male $\geq$ 1 | 11 | 1.030 (0.962, 1.103)        | 72.4% | 0.000 |
| MUFA      | Total mortality      | all male             | 7  | 0.974 (0.897, 1.058)        | 31.5% | 0.188 |
|           |                      | all female           | 3  | 1.014 (0.753, 1.366)        | 82.1% | 0.004 |
|           |                      | female/male $\geq$ 1 | 9  | 0.941 (0.870, 1.018)        | 82.6% | 0.000 |
| MUFA      | CVD events mortality | female/male<1        | 2  | 0.909 (0.705, 1.171)        | 30.2% | 0.231 |
|           |                      | all male             | 4  | 0.822 (0.761, 0.888)        | 6.7%  | 0.360 |
|           |                      | all female           | 5  | <b>0.948 (0.771, 1.165)</b> | 44.0% | 0.129 |
| PUFA      | Total mortality      | female/male $\geq$ 1 | 10 | <b>0.935 (0.874, 1.000)</b> | 29.5% | 0.173 |
|           |                      | all male             | 5  | <b>0.820 (0.744, 0.903)</b> | 0.0%  | 0.609 |
|           |                      | all female           | 3  | <b>0.866(0.811, 0.924)</b>  | 0.0%  | 0.722 |
| PUFA      | CVD events mortality | female/male $\geq$ 1 | 10 | 0.926(0.828, 1.036)         | 88.8% | 0.000 |
|           |                      | female/male<1        | 2  | 0.839(0.572, 1.230)         | 50.7% | 0.154 |
|           |                      | all male             | 4  | <b>0.866(0.811, 0.924)</b>  | 19.4% | 0.293 |
| Total fat | CVD events mortality | all female           | 5  | <b>0.855(0.731, 0.999)</b>  | 34.5% | 0.191 |
|           |                      | female/male $\geq$ 1 | 11 | <b>0.846(0.754, 0.950)</b>  | 83.7% | 0.000 |
|           |                      | all male             | 5  | 1.062(0.920, 1.225)         | 29.1% | 0.228 |
| SFA       | CVD events mortality | all female           | 17 | 0.983(0.941, 1.026)         | 0.0%  | 0.548 |
|           |                      | female/male $\geq$ 1 | 8  | 0.899(0.719, 1.125)         | 60.4% | 0.014 |
|           |                      | female/male<1        | 1  | 1.260(0.953, 1.013)         | .     | .     |
| MUFA      | CVD events mortality | all male             | 14 | 0.977(0.925, 1.031)         | 0.0%  | 0.723 |
|           |                      | all female           | 15 | 1.048(0.972, 1.131)         | 3.6%  | 0.412 |
|           |                      | female/male $\geq$ 1 | 10 | 0.901(0.790, 1.027)         | 59.2% | 0.009 |
| PUFA      | CVD events mortality | female/male<1        | 5  | 0.922(0.673, 1.261)         | 45.9% | 0.116 |
|           |                      | all male             | 19 | <b>0.935(0.874, 0.999)</b>  | 0.0%  | 0.846 |
|           |                      | all female           | 15 | 0.978(0.883, 1.083)         | 45.3% | 0.029 |
| Total fat | Stroke mortality     | female/male $\geq$ 1 | 7  | 0.786(0.585, 1.058)         | 69.0% | 0.004 |
|           |                      | female/male<1        | 2  | 0.546(0.113, 2.627)         | 77.5% | 0.035 |
|           |                      | all male             | 10 | 0.927(0.848, 1.012)         | 17.8% | 0.279 |
| SFA       | Stroke mortality     | all female           | 15 | 0.942(0.876, 1.013)         | 22.4% | 0.205 |
|           |                      | female/male $\geq$ 1 | 8  | 0.908(0.749, 1.101)         | 50.2% | 0.050 |
|           |                      | female/male<1        | 2  | 1.106(0.752, 1.626)         | 0.0%  | 0.659 |
| MUFA      | Stroke mortality     | all male             | 11 | 1.030(0.962, 1.104)         | 0.0%  | 0.472 |
|           |                      | all female           | 7  | 0.986(0.917, 1.061)         | 0.0%  | 0.638 |
|           |                      | female/male $\geq$ 1 | 4  | 0.921(0.595, 1.426)         | 65.9% | 0.032 |
| PUFA      | Stroke mortality     | all male             | 6  | 0.952(0.840, 1.079)         | 0.0%  | 0.927 |
|           |                      | all female           | 6  | 1.107(0.974, 1.257)         | 0.0%  | 0.665 |
|           |                      | female/male $\geq$ 1 | 7  | <b>0.747(0.664, 0.840)</b>  | 14.7% | 0.318 |
| Total fat | Stroke mortality     | female/male<1        | 1  | <b>0.220(0.061, 0.798)</b>  | .     | .     |
|           |                      | all male             | 9  | 0.998(0.862, 1.156)         | 0.0%  | 0.664 |
|           |                      | all female           | 6  | 1.032(0.898, 1.186)         | 0.0%  | 0.788 |
| SFA       | Stroke mortality     | female/male $\geq$ 1 | 3  | 0.714(0.462, 1.102)         | 26.3% | 0.257 |
|           |                      | female/male<1        | 1  | 0.210(0.051, 0.871)         | .     | .     |
|           |                      | all male             | 4  | 0.950(0.771, 1.169)         | 0.0%  | 0.990 |
| MUFA      | Stroke mortality     | all female           | 6  | 0.932(0.837, 1.037)         | 0.0%  | 0.658 |
|           |                      | female/male $\geq$ 1 | 3  | 0.927(0.789, 1.089)         | 0.0%  | 0.649 |
|           |                      | female/male<1        | 1  | 1.390(0.469, 4.120)         | .     | .     |
| PUFA      | Stroke mortality     | all male             | 4  | 0.961(0.796, 1.160)         | 0.0%  | 0.854 |
|           |                      | all female           | 2  | 1.004(0.894, 1.128)         | 86.4% | 0.000 |
|           |                      | female/male $\geq$ 1 | 6  | 1.081(0.969, 1.205)         | 78.3% | 0.000 |

|               |            |               |   |                            |       |       |
|---------------|------------|---------------|---|----------------------------|-------|-------|
| Carbohydrates | CVD events | female/male<1 | 2 | 1.688(0.948, 3.007)        | 45.9% | 0.174 |
|               |            | all male      | 2 | 1.073(0.888, 1.298)        | 92.3% | 0.000 |
|               |            | all female    | 9 | <b>1.123(1.045, 1.207)</b> | 0.0%  | 0.435 |
|               |            | female/male≥1 | 4 | 1.008(0.911, 1.115)        | 72.1% | 0.013 |
|               |            | female/male<1 | 1 | 0.590(0.220, 1.581)        | .     | .     |
| Carbohydrates | CVD events | all male      | 6 | 1.042(0.984, 1.103)        | 0.0%  | 0.809 |
|               |            | all female    | 4 | 0.966(0.896, 1.041)        | 0.0%  | 0.927 |
|               | mortality  | female/male≥1 | 3 | 1.162(0.886, 1.526)        | 83.0% | 0.003 |
|               |            | all male      | 4 | 1.004(0.888, 1.134)        | 52.6% | 0.097 |

**Table S10.** religion subgroup-analysis of dietary macronutrient intake and on mortality or CVD events

| Exposure       | Endpoint             | Stratum       | Number of cohorts | Pooled RR(95%CI)           | Text of heterogeneity     |                |
|----------------|----------------------|---------------|-------------------|----------------------------|---------------------------|----------------|
|                |                      |               |                   |                            | <i>I</i> <sup>2</sup> (%) | <i>p</i> value |
| Total protein  | Total mortality      | North America | 9                 | 0.899(0.769, 1.052)        | 60.8%                     | 0.009          |
|                |                      | Europe        | 11                | 1.003(0.948, 1.060)        | 75.2%                     | 0.000          |
|                |                      | Asia          | 4                 | 0.904(0.759, 1.075)        | 59.1%                     | 0.062          |
| Total protein  | Cancer mortality     | North America | 8                 | 0.836(0.649, 1.076)        | 73.5%                     | 0.000          |
|                |                      | Europe        | 5                 | 0.989(0.967, 1.012)        | 0.0%                      | 0.570          |
|                |                      | Asia          | 4                 | 0.922(0.633, 1.344)        | 66.6%                     | 0.030          |
| Total protein  | CVD events mortality | North America | 5                 | 0.968(0.825,1.135)         | 0.0%                      | 0.052          |
|                |                      | Europe        | 5                 | 1.000(0.931, 1.074)        | 57.5%                     | 0.619          |
|                |                      | Asia          | 6                 | 0.920(0.779,1.086)         | 17.1%                     | 0.303          |
| Animal protein | Total mortality      | North America | 3                 | 1.005(0.961, 1.051)        | 31.2%                     | 0.234          |
|                |                      | Europe        | 4                 | <b>1.270(1.071, 1.507)</b> | 55.3%                     | 0.081          |
|                |                      | Asia          | 3                 | 0.921(0.806, 1.053)        | 22.4%                     | 0.276          |
| Animal protein | Cancer mortality     | North America | 4                 | 0.987(0.927, 1.051)        | 11.0%                     | 0.338          |
|                |                      | Europe        | 3                 | 1.113(0.869, 1.424)        | 44.0%                     | 0.167          |
|                |                      | Asia          | 3                 | 0.918(0.780, 1.081)        | 4.5%                      | 0.351          |
| Animal protein | CVD events mortality | North America | 4                 | <b>1.070(1.004, 1.139)</b> | 0.888                     | 0.0%           |
|                |                      | Europe        | 2                 | 1.790(0.796, 4.026)        | 0.042                     | 75.9%          |
|                |                      | Asia          | 6                 | 0.937(0.766, 1.145)        | 0.219                     | 28.7%          |
| Plant protein  | Total mortality      | North America | 3                 | <b>0.905(0.869,0.943)</b>  | 0.0%                      | 0.705          |
|                |                      | Europe        | 4                 | 1.016(0.856,1.206)         | 37.2%                     | 0.189          |
|                |                      | Asia          | 3                 | 0.869(0.702,1.075)         | 58.9%                     | 0.088          |
| Plant protein  | Cancer mortality     | North America | 4                 | 0.989(0.889, 1.099)        | 42.8%                     | 0.155          |
|                |                      | Europe        | 3                 | 0.893(0.741, 1.075)        | 0.0%                      | 0.375          |
|                |                      | Asia          | 3                 | 0.969(0.689,1.363)         | 56.2%                     | 0.102          |
| Plant protein  | CVD events mortality | North America | 4                 | <b>0.825(0.741,0.919)</b>  | 32.5%                     | 0.217          |
|                |                      | Europe        | 2                 | 1.147(0.884, 1.489)        | 0.0%                      | 0.371          |
|                |                      | Asia          | 7                 | <b>0.811(0.698, 0.942)</b> | 0.0%                      | 0.652          |
| Total protein  | CVD events           | North America | 3                 | <b>0.881(0.680, 1.141)</b> | 80.3%                     | 0.006          |
|                |                      | Europe        | 8                 | <b>0.855(0.778,0.941)</b>  | 11.0%                     | 0.345          |
| Total fat      | Total mortality      | North America | 4                 | <b>0.855(0.791, 0.923)</b> | 65.6%                     | 0.033          |
|                |                      | Europe        | 5                 | 0.971(0.758, 1.243)        | 78.2%                     | 0.001          |
|                |                      | Asia          | 6                 | 0.963(0.856, 1.083)        | 78.8%                     | 0.000          |
| Total fat      | CVD events mortality | North America | 10                | 0.935(0.852, 1.027)        | 77.6%                     | 0.000          |
|                |                      | Europe        | 7                 | 0.987(0.858,1.135)         | 60.9%                     | 0.018          |
|                |                      | Asia          | 5                 | 0.999(0.817, 1.221)        | 69.4%                     | 0.011          |

|               |                      |               |           |                            |              |              |
|---------------|----------------------|---------------|-----------|----------------------------|--------------|--------------|
| SFA           | Total mortality      | North America | 7         | 1.036(0.930, 1.153)        | 98.0%        | 0.000        |
|               |                      | Europe        | 9         | 1.083(0.986, 1.190)        | 4.8%         | 0.395        |
|               |                      | Asia          | 6         | 1.061(0.939, 1.199)        | 70.8%        | 0.004        |
| SFA           | CVD events mortality | North America | 13        | <b>1.064(1.011, 1.120)</b> | 66.0%        | 0.000        |
|               |                      | Europe        | 7         | 0.979(0.785, 1.222)        | 61.9%        | 0.015        |
|               |                      | Asia          | 6         | 0.943(0.836, 1.063)        | 39.1%        | 0.145        |
| MUFA          | Total mortality      | North America | 6         | 0.914(0.832, 1.005)        | 96.0%        | 0.000        |
|               |                      | Europe        | 7         | 0.887(0.739, 1.064)        | 46.1%        | 0.084        |
|               |                      | Asia          | 5         | 0.956(0.897, 1.020)        | 13.5%        | 0.328        |
| MUFA          | CVD events mortality | North America | 12        | <b>0.891(0.823, 0.965)</b> | 57.8%        | 0.006        |
|               |                      | Europe        | 5         | <b>0.822(0.681, 0.992)</b> | 15.4%        | 0.316        |
|               |                      | Asia          | 5         | 0.931(0.836, 1.037)        | 4.1%         | 0.383        |
| PUFA          | Total mortality      | North America | 7         | <b>0.889(0.833, 0.949)</b> | 81.5%        | 0.000        |
|               |                      | Europe        | 8         | 0.903(0.755, 1.080)        | 70.0%        | 0.001        |
|               |                      | Asia          | 5         | 0.947(0.787, 1.140)        | 89.1%        | 0.000        |
| PUFA          | CVD events mortality | North America | 12        | <b>0.882(0.806, 0.965)</b> | 75.7%        | 0.000        |
|               |                      | Europe        | 6         | 1.025(0.875, 1.200)        | 19.3%        | 0.288        |
|               |                      | Asia          | 5         | 0.961(0.675, 1.367)        | 88.5%        | 0.000        |
| Total fat     | CVD events           | North America | 20        | 0.994(0.948, 1.042)        | 15.6%        | 0.260        |
|               |                      | Europe        | 17        | 0.957(0.889, 1.030)        | 10.0%        | 0.337        |
|               |                      | Asia          | 2         | 0.685(0.342, 1.374)        | 42.2%        | 0.189        |
| SFA           | CVD events           | North America | 16        | 1.053(0.978, 1.134)        | 5.6%         | 0.389        |
|               |                      | <b>Europe</b> | <b>21</b> | <b>0.934(0.874, 0.998)</b> | <b>11.4%</b> | <b>0.310</b> |
|               |                      | Asia          | 10        | <b>0.815(0.713, 0.932)</b> | 26.4%        | 0.201        |
| MUFA          | CVD events           | North America | 13        | 0.946(0.846, 1.059)        | 54.4%        | 0.010        |
|               |                      | Europe        | 17        | 0.977(0.888, 1.075)        | 32.0%        | 0.100        |
|               |                      | Asia          | 3         | <b>0.402(0.212, 0.762)</b> | 0.0%         | 0.486        |
| PUFA          | CVD events           | North America | 13        | 0.962(0.883, 1.047)        | 24.7%        | 0.194        |
|               |                      | Europe        | 18        | 0.987(0.923, 1.056)        | 20.3%        | 0.212        |
|               |                      | Asia          | 3         | 1.096(0.646, 1.860)        | 0.0%         | 0.605        |
|               |                      | South America | 1         | 0.580(0.393, 0.856)        | .            | .            |
| Total fat     | Stroke               | North America | 8         | 1.006(0.912, 1.109)        | 19.8%        | 0.273        |
|               |                      | Europe        | 6         | 0.989(0.874, 1.119)        | 0.0%         | 0.940        |
|               |                      | Asia          | 2         | 0.685(0.342, 1.374)        | 42.2%        | 0.189        |
| SFA           | Stroke               | North America | 4         | 1.109(0.921, 1.336)        | 0.0%         | 0.839        |
|               |                      | Europe        | 7         | 1.083(0.952, 1.233)        | 0.0%         | 0.938        |
|               |                      | Asia          | 11        | <b>0.765(0.654, 0.895)</b> | 39.2%        | 0.087        |
| MUFA          | Stroke               | North America | 3         | 1.033(0.848, 1.259)        | 0.0%         | 0.592        |
|               |                      | Europe        | 7         | 0.992(0.861, 1.144)        | 0.0%         | 0.936        |
|               |                      | Asia          | 3         | 0.402(0.212, 0.762)        | 0.0%         | 0.486        |
| PUFA          | Stroke               | North America | 3         | 0.974(0.813, 1.167)        | 0.0%         | 0.623        |
|               |                      | Europe        | 7         | 0.926(0.831, 1.032)        | 0.0%         | 0.813        |
|               |                      | Asia          | 3         | 1.096(0.646, 1.860)        | 0.0%         | 0.605        |
| Carbohydrates | Total mortality      | North America | 5         | <b>1.120(1.006, 1.246)</b> | 74.6%        | 0.001        |
|               |                      | Europe        | 3         | <b>0.969(0.943, 0.996)</b> | 8.9%         | 0.333        |
|               |                      | Asia          | 4         | 0.987(0.918, 1.061)        | 0.0%         | 0.489        |
| Carbohydrates | CVD events           | North America | 8         | <b>1.079(1.012, 1.150)</b> | 24.5%        | 0.233        |
|               |                      | Europe        | 7         | 1.091(0.984, 1.210)        | 0.0%         | 0.756        |
|               |                      | Asia          | 2         | 1.357(0.288, 6.404)        | 84.9%        | 0.010        |
| Carbohydrates | CVD events           | North America | 3         | 1.187(0.955, 1.477)        | 73.1%        | 0.024        |

|           |        |   |                     |      |       |
|-----------|--------|---|---------------------|------|-------|
| mortality | Europe | 2 | 0.979(0.934, 1.026) | 0.0% | 0.441 |
|           | Asia   | 5 | 0.953(0.873, 1.040) | 0.0% | 0.522 |

**Table S11.** Begg's test and Egger's test for publication bias among studies

| <b>Exposure</b> | <b>Endpoint</b>      | <b>Begg's Test Pr &gt;  z </b> | <b>Egger's test Pr &gt;  t </b> |
|-----------------|----------------------|--------------------------------|---------------------------------|
| Total protein   | Total mortality      | 0.941                          | 0.282                           |
| Total protein   | Cancer mortality     | 0.711                          | 0.292                           |
| Total protein   | CVD events mortality | 0.108                          | 0.261                           |
| Animal protein  | Total mortality      | 0.371                          | 0.539                           |
| Animal protein  | Cancer mortality     | 0.721                          | 0.482                           |
| Animal protein  | CVD events mortality | 1.000                          | 0.810                           |
| Plant protein   | Total mortality      | 1.000                          | 0.628                           |
| Plant protein   | Cancer mortality     | 0.721                          | 0.562                           |
| Plant protein   | CVD events mortality | 0.592                          | 0.314                           |
| Total protein   | CVD events           | 0.913                          | 0.996                           |
| Animal protein  | CVD events           | 0.348                          | 0.291                           |
| Plant protein   | CVD events           | 0.348                          | 0.439                           |
| Total protein   | Stroke               | 0.806                          | 0.464                           |
| Total fat       | Total mortality      | 0.822                          | 0.351                           |
| Total fat       | CVD events mortality | 0.958                          | 0.505                           |
| Total fat       | Cancer mortality     | 0.244                          | 0.153                           |
| SFA             | Total mortality      | 0.778                          | 0.869                           |
| SFA             | CVD events mortality | 0.930                          | 0.125                           |
| SFA             | Cancer mortality     | 0.876                          | 0.391                           |
| MUFA            | Total mortality      | 0.762                          | 0.334                           |
| MUFA            | CVD events mortality | 0.786                          | 0.967                           |
| MUFA            | Cancer mortality     | 0.533                          | 0.315                           |
| PUFA            | Total mortality      | 0.721                          | 0.417                           |
| PUFA            | CVD events mortality | 0.712                          | 0.764                           |
| PUFA            | Cancer mortality     | 0.755                          | 0.223                           |
| Total fat       | CVD events           | 0.914                          | 0.916                           |
| SFA             | CVD events           | 0.518                          | 0.166                           |
| MUFA            | CVD events           | 0.236                          | 0.969                           |
| PUFA            | CVD events           | 0.161                          | 0.183                           |
| Total fat       | CVD                  | 0.152                          | 0.376                           |
| SFA             | CVD                  | 0.371                          | 0.350                           |
| MUFA            | CVD                  | 0.711                          | 0.140                           |
| PUFA            | CVD                  | 0.621                          | 0.529                           |
| Total fat       | Stroke               | 0.773                          | 0.577                           |
| SFA             | Stroke               | 0.561                          | 0.900                           |
| MUFA            | Stroke               | 0.009                          | 0.002                           |
| PUFA            | Stroke               | 0.228                          | 0.279                           |
| Carbohydrates   | Total mortality      | 0.161                          | 0.049                           |
| Carbohydrates   | CVD mortality        | 0.251                          | 0.088                           |
| Carbohydrates   | Cancer mortality     | 0.917                          | 0.358                           |
| Carbohydrates   | CVD events           | 0.329                          | 0.317                           |
| Carbohydrates   | Stroke               | 0.764                          | 0.847                           |
